# Supplementary material for: Natural deep eutectics: expanding green solvents for thermally-/photo-induced polymerization of N-isopropylacrylamide toward key components for sustainable production of semi-natural polymers
Source: Royal Society of Chemistry journal article supplement (doi:10.1039/d4py00699b), 2024-01-01
Supplement: d4py00699b1.pdf [file d4py00699b1.pdf]

## Supplementary Information

# Natural Deep Eutectics: Expanding Green Solvents for Thermal-/Photo-Induced Polymerization of *N*- Isopropylacrylamide Toward Key Components for Sustainable Production of Semi-Natural Polymers

*Shingo Yuki*<sup>†</sup>, *Reina, Shinohe*<sup>†</sup>, *Yuta Tanaka*<sup>†</sup> *Hideharu Mori*<sup>†\*</sup>

<sup>†</sup>Graduate School of Organic Materials Science, Yamagata University, 4-3-16, Jonan, Yonezawa, 992-8510, Japan

## EXPERIMENTAL SECTION

### 1. Materials

*N*-Isopropylacrylamide (NIPAM, Wako, > 98.0%) was purified by recrystallization from hexane. Thymol (Thy, TCI, >99.0 %), (±)-menthol (Men, TCI, >98.0 %), coumarin (Cou, Wako, >98.0 %), and 1-tetradecanol (Tdc, TCI, >98.0 %) were used without further purification. The melting points, as stated by the supplier, are 49.0–52.0 °C for Thy, 28 °C for Men, 68–72 °C for Cou, 38.0–41.0 °C for Tdc, and 63.0–67.0 °C for NIPAM. 2,2'-Azobis(isobutyronitrile) (AIBN, Kanto Chemical, 97 %) was purified by recrystallization from methanol. 2,2-Dimethoxy-2-phenylacetophenone (DMPA, TCI, >98.0%), 2-cyano-2-propyl dodecyl trithiocarbonate (97%, Sigma Aldrich), and other materials were used without further purification.

### 2. Preparation of natural deep eutectic solvents (NADESs) and polymerization in NADESs

#### 2.1. Preparation of NADESs

NADESs were prepared by simple mixing two solids (e.g., Thy/Men, Thy/Cou, and Tdc/Men) at different feed ratios (1/2, 1/1, and 2/1), according to a reported method.<sup>1</sup> For instance, Thy (1.50g, 10.0 mmol) and Men (1.56 g, 10.0 mmol) were placed in a 10 mL glass vial equipped with a magnetic stirring bar and sealed with a plastic cap. The mixture was stirred under ambient conditions (approximately 25 °C in the air) for 3 h to afford Thy/Men (1/1) as a colorless liquid. The same simple method was used for the preparation of other NADESs. In all cases, mixing was performed under ambient conditions until a homogeneous solution was obtained (approximately 1 h for Thy/Men (1/2), 1.5 h for Tdc/Men (1/2), 2 h for Thy/Cou (1/1), and 1.5 h for Thy/Cou (2/1), respectively). The resulting NADESs were insoluble in water, and displayed a good miscibility in organic solvents, such as diethyl ether (Table S1). These hydrophobic NADESs, which were characterized by proton nuclear magnetic resonance (<sup>1</sup>H NMR) measurement (Figure S1), were used directly for the polymerization.

## 2.2. Thermally-induced polymerization of NIPAM in NADES

A typical procedure for the thermally-induced free radical polymerization is as follows (Run 1 in Table 1): AIBN (1.64 mg, 0.01 mmol) and NIPAM (113 mg, 1.0 mmol) were dissolved in Thy/Men (1/1) NADES (339 mg, [M] = 25 wt. %) in a polymerization ampoule, and the mixture was degassed by three freeze-evacuate-thaw cycles. After sealing the ampoule, polymerization was performed at 60 °C for 24 h. Monomer conversion (>99%) was evaluated using <sup>1</sup>H NMR measurement of the crude product (Figure S3) by comparing the integration of the CH<sub>2</sub>=C- resonance at 5.50 ppm with that of the -CH- main chain peak at 3.80 ppm. The mixture was purified by precipitation in diethyl ether, followed by filtration and then drying in vacuum to give PNIPAM (91.8 mg, yield = 81 %). The resulting PNIPAM was further characterized by <sup>1</sup>H NMR and size-exclusion chromatography (SEC) measurements (Figures S3 and S4).

For the thermally-induced RAFT polymerization (Run 2 in Table S3) using a trithiocarbonate-type chain transfer agent (CTA), AIBN (3.28 mg, 0.02 mmol), 2-cyano-2-propyl dodecyl trithiocarbonate (13.8 mg, 0.04 mmol), and NIPAM (453 mg, 4.0 mmol) were dissolved in Thy/Men (1/1) NADES (1.36 g, [M] = 25 wt. %). Thereafter, polymerization was performed in a sealed glass ampoule using the same procedure as that used for the thermally-induced free radical polymerization.

## 2.3. Photo-induced polymerization of NIPAM in NADES

A typical procedure for the photo-induced free radical polymerization of NIPAM is as follows (Run 3 in Table S7): DMPA (5.13mg, 0.02 mmol), NIPAM (226 mg, 2.0 mmol), and Thy/Men (1/1) NADES (0.528 g, [M] = 30 wt. %) were placed in a 5 mL glass vial. The mixture was stirred under air at room temperature for approximately 30 min with light shielding until a homogeneous solution was obtained. The mixture was irradiated with a mercury UV lamp (365 nm, 6.0 mW/cm<sup>2</sup>, HLR100T-2 with HB100A) for 10 min under ambient conditions. The determination of the monomer conversion (94 %) by <sup>1</sup>H NMR, purification of the crude product by precipitation in diethyl ether (Yield = 77 %, 0.175 g), and characterization of resulting PNIPAM by <sup>1</sup>H NMR and SEC measurements were conducted using the same procedures as those used for the thermally-induced free radical polymerization.

For the photo-induced RAFT polymerization, DMPA (5.13mg, 0.02 mmol), NIPAM (226 mg, 2.0 mmol), and CTA (6.91 mg, 0.02 mmol) were dissolved in Thy/Men (1/1) NADES (0.528 g, [M] = 30 wt. %). Thereafter, polymerization was conducted by photolyzing with a 365 nm wavelength LED–UV light (HLV-24UV365-4WNRBT, CCS Inc., 6 cm away, LED = 330 mW/cm<sup>2</sup>) under ambient conditions.

### 3. Synthesis and polymerization of NIPAM-based natural deep eutectic monomers (NADEMs)

#### 3.1. Synthesis of NIPAM-based natural deep eutectic monomers (NADEMs)

All NADEMs were prepared by simple mixing of NIPAM with natural components (Thy, Men, Cou, and Tdc) under atmospheric conditions. As a representative example of NIPAM/Men (1/1), NIPAM (0.339 g, 3.0 mmol) and Men (0.469 g, 3.0 mmol) were placed in a 10 mL glass vial equipped with a magnetic stirring bar in air. The mixture was stirred on a hot plate at 30 °C for 30 min to afford NIPAM/Men as a colorless liquid.

#### 3.2 Photo-induced polymerization of NIPAM-based NADEMs

The resulting NIPAM/Men (1/1) NADEM was used directly for the photo-induced polymerization. To the NIPAM/Men (1/1) NADEM (790 mg, 3.0 mmol) in the glass vial, DMPA (7.7 mg, 0.03 mmol) was added, and the mixture was stirred under air at room temperature for approximately 5 min with light shielding until a homogeneous solution was obtained. After the magnetic stirring bar was removed, photo-induced radical polymerization was conducted by photolyzing with a 365 nm wavelength LED–UV light (HLV-24UV365-4WNRBT, CCS Inc., 10 cm away, LED = 130 mW/cm<sup>2</sup>) under ambient conditions. After the polymerization, the mixture was dissolved in a small amount of methanol, and purified by precipitation in diethyl ether, followed by filtration and drying under vacuum to give PNIPAM (270 g, yield = 79 %).

The same procedures were used for the preparation of other NADEMs and subsequent photo-induced polymerization. When the NADEM was prepared at higher polymerization temperatures (e.g., 50 °C for the preparation for NIPAM/Tdc (1/1)) NADEM was prepared by heating and stirring two solids using a

hot plate, and used directly for the photopolymerization. The  $^1\text{H}$  NMR and digital photographs of the NIPAM-based NADEMs and corresponding NADEM-based polymers are shown in Table 2 and Figures S16-S19 (Supporting Information).

### 3. Instrumentation

$^1\text{H}$  NMR (400 MHz) spectra were recorded with a JEOL JNM-ECX400. FT-IR spectra were obtained with a JASCO FT/IR-210 spectrometer. The dyad tacticity of PNIPAM was evaluated from the methylene proton peaks recorded in  $\text{DMSO-}d_6$  at 150 °C. 2D NMR spectra were recorded on a JEOL ECZ-600 at a resonant frequency of 600 MHz. SEC measurement was conducted on a Tosoh HPLC HLC-8220 system equipped with refractive index and ultraviolet detectors at 40 °C. The column set was as follows: four consecutive hydrophilic vinyl polymer-based gel columns (TSK-GELs:  $\alpha$ -M,  $\alpha$ -4000,  $\alpha$ -3000,  $\alpha$ -2500) and a guard column (TSK-guardcolumn  $\alpha$ ]. The samples were run at a flow rate of 1.0 mL/min using DMF containing 10 mM LiBr as the eluent. The number-average molecular weight ( $M_n$ ) and molecular weight distribution ( $M_w/M_n$ ) were estimated relative to polystyrene standards (Tosoh) ranging from 1050 to 1090000. The UV-vis spectra were recorded on JASCO V-630BIO UV-vis spectrophotometer. The transmittance of the aqueous polymer solution was recorded on a JASCO V-630BIO UV-vis spectrophotometer equipped with a temperature controller (JASCO EHC-716 and EHC-717, respectively).<sup>2</sup>

Tensile tests were performed using a MX2-500N (IMADA Co., Ltd.) with a digital force gauge ZTA-500N machine (IMADA Co., Ltd.). For the preparation of the dog bone-shaped specimen (effective gauge dimensions: length = 12 mm, width = 2 mm, and thickness = 1.0 mm), NADEM and DMPA (0.01 mol % for NADEM) were introduced into a Teflon mold, followed by photolyzing with a 365 nm wavelength LED-UV light (LNSP-100UV3-365-FN, CCS Inc., 10 cm away, LED = 130 mW/cm<sup>2</sup>) under ambient conditions for 1 min. The specimen was subjected to a tensile test.

**Table S1.** Miscibility of NADESs with common solvents and solubility of NIAPM in NADESs

| Solvent /monomer | Thy/Men (1/1) | Thy/Men (1/2) | Tdc/Men (1/2) | Thy/Cou (1/1) | Thy/Cou (2/1) |
|------------------|---------------|---------------|---------------|---------------|---------------|
| H <sub>2</sub> O | -             | -             | -             | -             | -             |
| Acetone          | +             | +             | +             | +             | +             |
| Chloroform       | +             | +             | +             | +             | +             |
| Dichloromethane  | +             | +             | +             | +             | +             |
| Diethyl ether    | +             | +             | +             | +             | +             |
| Ethanol          | +             | +             | +             | +             | +             |
| Ethyl acetate    | +             | +             | +             | +             | +             |
| Methanol         | +             | +             | +             | +             | +             |
| <i>n</i> -Hexane | +             | +             | +             | +             | +             |
| THF              | +             | +             | +             | +             | +             |
| DMF              | +             | +             | +             | +             | +             |
| NIPAM            | ++            | ++            | ++            | ++            | ++            |

+ : Miscible at room temperature. - : Immiscible at room temperature. ++ : Soluble at room temperature ([M] = 25 wt%).

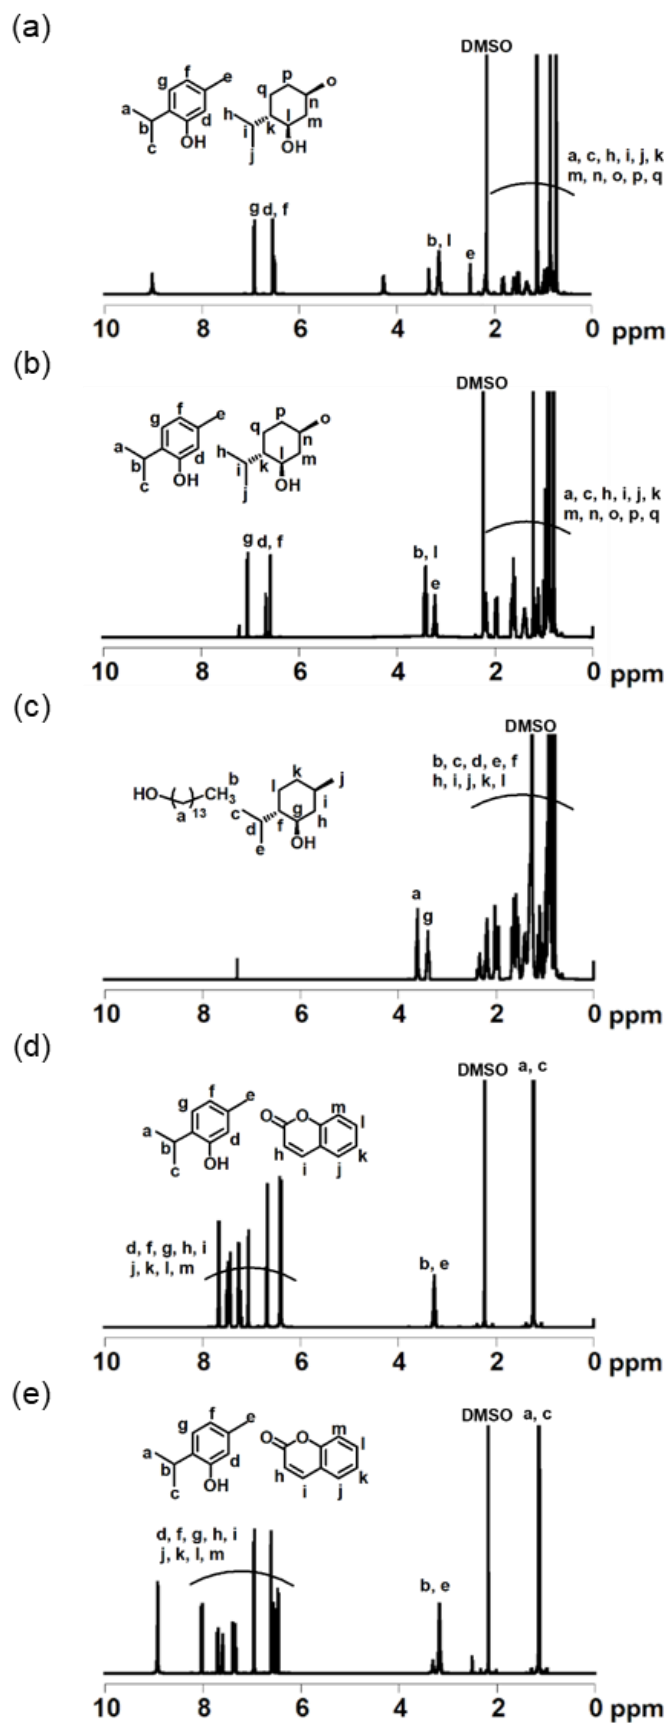

**Figure S1.** <sup>1</sup>H NMR spectra (DMSO-*d*<sub>6</sub>) of NADESs: (a) Thy/Men (1/1), (b) Thy/Men (1/2), (c) Tdc/Men (1/2), Thy/Cou (1/1), and Thy/Cou (2/1).

### Polymerization at 60 °C

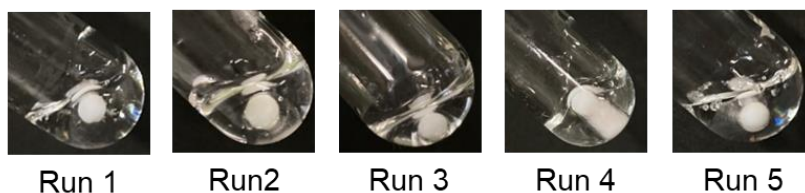

### Polymerization at 90 °C

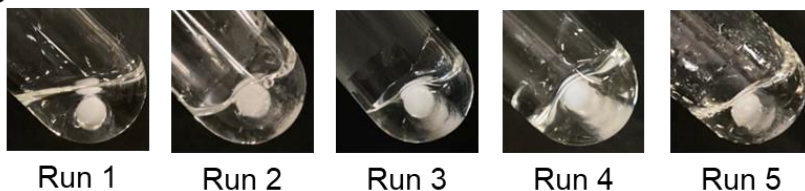

**Figure S2.** Appearance of polymerized products obtained by free radical polymerization of NIPAM in various NADESs (see Table 1 and Table S2 for detailed polymerization conditions).

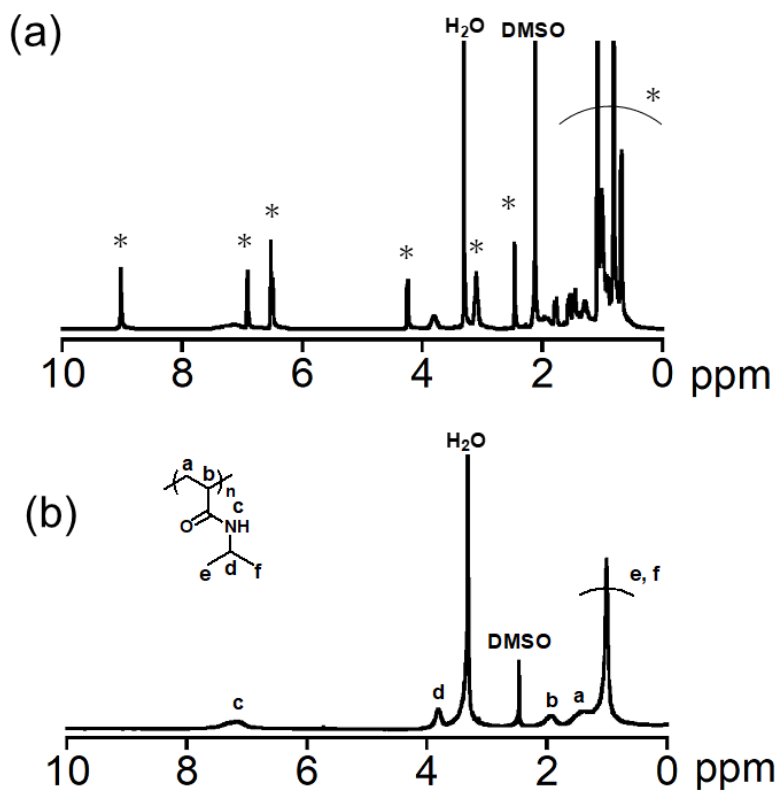

**Figure S3.** <sup>1</sup>H NMR spectra (DMSO-*d*<sub>6</sub>) of (a) crude product prepared by the thermally-induced free radical polymerization of NIPAM in Thy/Men (1/1) (Run 1 in Table 1) and (b) PNIPAM purified by reprecipitation into diethyl ether and isolated by filtration. The asterisk corresponds to the peaks attributed to Thy/Men (1/1).



**Table S2.** Thermally-induced free radical polymerization of NIPAM in hydrophobic NADESs at 90 °C<sup>a)</sup>

| Run | Solvent       | Conv. <sup>b)</sup> / Yield <sup>c)</sup> | $M_n$ <sup>d)</sup> | $M_w/M_n$ <sup>d)</sup> |
|-----|---------------|-------------------------------------------|---------------------|-------------------------|
|     |               | (%)                                       | (SEC)               | (SEC)                   |
| 1   | Thy/Men (1/1) | 98/68                                     | 25000               | 1.89                    |
| 2   | Thy/Men (1/2) | 98/76                                     | 33000               | 2.05                    |
| 3   | Tdc/Men (1/2) | >99/86                                    | 67000               | 2.73                    |
| 4   | Thy/Cou (1/1) | -/81                                      | 26000               | 1.89                    |
| 5   | Thy/Cou (2/1) | 78/69                                     | 13000               | 1.91                    |

<sup>a)</sup> Polymerization with AIBN at 90 °C for 24 h.  $[I]_0/[M]_0 = 1/100$ .  $[M] = 25$  wt%. <sup>b)</sup> Calculated using <sup>1</sup>H NMR spectroscopy in DMSO-*d*<sub>6</sub>. <sup>c)</sup> Diethyl ether insoluble fraction. <sup>d)</sup> Measured by size-exclusion chromatography (SEC) using a polystyrene standard in *N,N*-dimethylformamide (DMF, 10 mM LiBr).

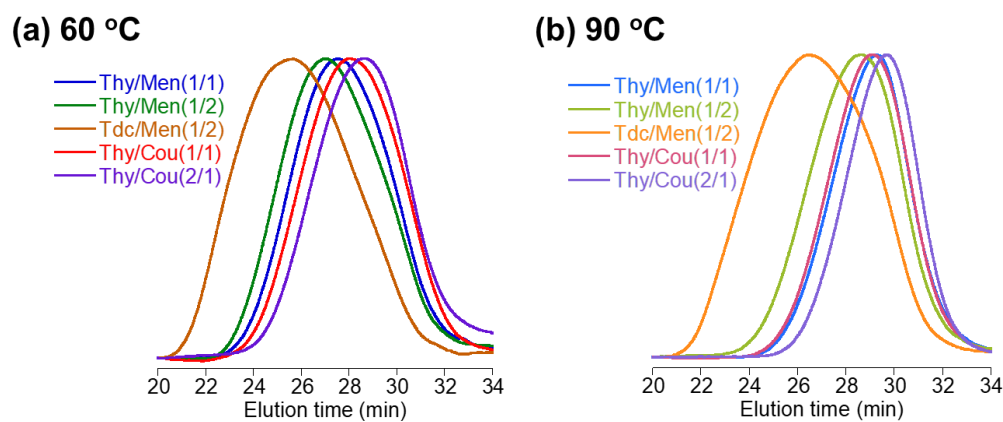**Figure S4.** SEC curves (RI traces, DMF, LiBr) of PNIPAMs obtained by free radical polymerization of NIPAM in various NADESs at (a) 60 °C and (b) 90 °C (see Table 1 and Table S2 for detailed polymerization conditions).

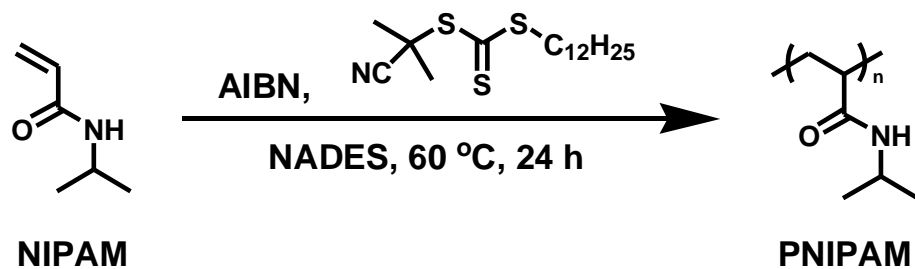

**Scheme S1.** Thermally-induced RAFT polymerization of NIPAM in NADES.

**Table S3.** Thermally-induced RAFT polymerization of NIPAM in NADES <sup>a)</sup>

| Run | Solvent | [I] <sub>0</sub> /[CTA] <sub>0</sub> /[M] <sub>0</sub> | Conv. <sup>b)</sup><br>/Yield <sup>c)</sup><br>(%) | <i>M<sub>n</sub></i> <sup>b)</sup><br>(theory) | <i>M<sub>n</sub></i> <sup>d)</sup><br>(SEC) | <i>M<sub>w</sub></i> / <i>M<sub>n</sub></i> <sup>d)</sup><br>(SEC) |
|-----|---------|--------------------------------------------------------|----------------------------------------------------|------------------------------------------------|---------------------------------------------|--------------------------------------------------------------------|
| 1   |         | 1/2/100                                                | 99/40                                              | 6000                                           | 8000                                        | 1.21                                                               |
| 2   | Thy/Men | 1/2/200                                                | 92/60                                              | 11000                                          | 17000                                       | 1.19                                                               |
| 3   | (1/1)   | 1/2/400                                                | 55/44                                              | 16000                                          | 21000                                       | 1.27                                                               |
| 4   |         | 1/2/1000                                               | 28/24                                              | 14000                                          | 25000                                       | 1.35                                                               |
| 5   |         | 1/2/100                                                | >99/31                                             | 5600                                           | 12000                                       | 1.18                                                               |
| 6   | Tdc/Men | 1/2/200                                                | >99/83                                             | 11000                                          | 18000                                       | 1.21                                                               |
| 7   | (1/2)   | 1/2/400                                                | >99/94                                             | 22000                                          | 32000                                       | 1.28                                                               |
| 8   |         | 1/2/1000                                               | 97/87                                              | 55000                                          | 52000                                       | 1.34                                                               |

<sup>a)</sup> Polymerization with AIBN at 60 °C for 24 h. [M] = 25 wt%. <sup>b)</sup> Calculated by <sup>1</sup>H NMR in DMSO-*d*<sub>6</sub>. <sup>c)</sup> Diethyl ether-insoluble part. <sup>d)</sup> Measured by size-exclusion chromatography (SEC) using polystyrene standard in *N,N*-dimethylformamide (DMF, 10 mM LiBr).

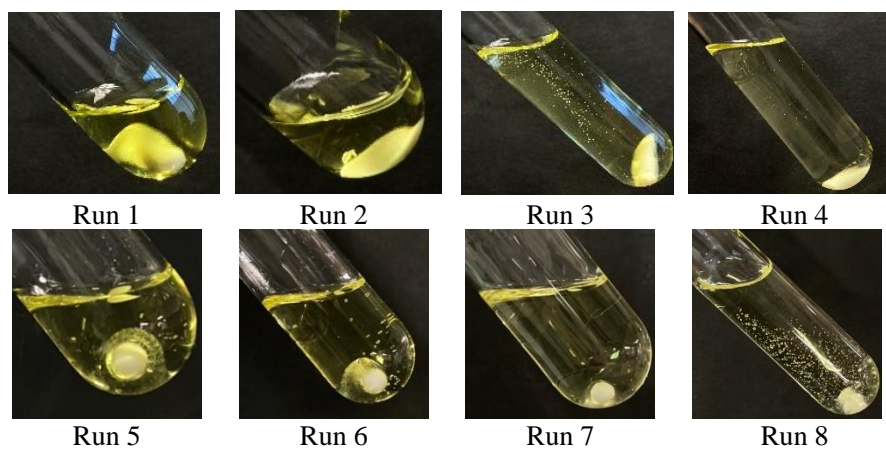

**Figure S5.** Appearance of polymerized products obtained by thermally-induced RAFT polymerization of NIPAM at different  $[M]/[CTA]$  ratios in NADESs (Run 1–Run 4 : Thy/Men (1/1), Run 5–Run 8 : Tdc/Men (1/2) in Table S3).

**Table S4.** Thermally-induced RAFT polymerization of NIPAM in NADESs <sup>a)</sup>

| Run | Solvent          | Time<br>(h) | Conv. <sup>b)</sup><br>(%) | $M_n$ <sup>b)</sup><br>(theo) | $M_n$ <sup>c)</sup><br>(SEC) | $M_w/M_n$ <sup>c)</sup><br>(SEC) |
|-----|------------------|-------------|----------------------------|-------------------------------|------------------------------|----------------------------------|
| 1   |                  | 1           | 0                          | -                             | -                            | -                                |
| 2   | Thy/Men<br>(1/1) | 2           | 10                         | 1500                          | -                            | -                                |
| 3   |                  | 4           | 26                         | 3300                          | -                            | -                                |
| 4   |                  | 8           | 75                         | 9000                          | 8200                         | 1.15                             |
| 5   |                  | 24          | 99                         | 12000                         | 11000                        | 1.17                             |
| 6   |                  | 1           | 0                          | -                             | -                            | -                                |
| 7   | Thy/Men<br>(1/2) | 2           | 2                          | 600                           | -                            | -                                |
| 8   |                  | 4           | 64                         | 7600                          | 7400                         | 1.17                             |
| 9   |                  | 8           | 85                         | 10000                         | 9000                         | 1.18                             |
| 10  |                  | 24          | 99                         | 12000                         | 10000                        | 1.20                             |
| 11  |                  | 1           | 48                         | 5800                          | -                            | -                                |
| 12  | Tdc/Men<br>(1/2) | 2           | 92                         | 11000                         | 11000                        | 1.15                             |
| 13  |                  | 4           | 99                         | 12000                         | 11000                        | 1.14                             |
| 14  |                  | 8           | 99                         | 12000                         | 11000                        | 1.13                             |
| 15  |                  | 24          | 99                         | 12000                         | 10000                        | 1.14                             |
| 16  |                  | 1           | 1                          | 460                           | -                            | -                                |
| 17  | Thy/Cou<br>(1/1) | 2           | 15                         | 2000                          | -                            | -                                |
| 18  |                  | 4           | 71                         | 8400                          | 16000                        | 1.21                             |
| 19  |                  | 8           | 76                         | 8900                          | 15000                        | 1.21                             |
| 20  |                  | 24          | 90                         | 11000                         | 16000                        | 1.24                             |
| 21  |                  | 1           | 0                          | -                             | -                            | -                                |
| 22  | Thy/Cou<br>(2/1) | 2           | 0                          | -                             | -                            | -                                |
| 23  |                  | 4           | 28                         | 3500                          | -                            | -                                |
| 24  |                  | 8           | 59                         | 7000                          | 6400                         | 1.19                             |
| 25  |                  | 24          | 78                         | 9000                          | 7600                         | 1.23                             |
| 26  |                  | DMF         | 3                          | 82                            | 10000                        | 9100                             |
| 27  | 6                |             | 94                         | 11000                         | 9600                         | 1.22                             |

<sup>a)</sup> Polymerization with AIBN at 60 °C for 24 h.  $[I]_0/[CTA]_0/[M]_0 = 1/2/200$ .  $[M] = 25$  wt%. <sup>b)</sup> Calculated by <sup>1</sup>H NMR in DMSO-*d*<sub>6</sub>. <sup>c)</sup> Measured by size-exclusion chromatography (SEC) using polystyrene standard in *N,N*-dimethylformamide (10 mM LiBr).

(a) Thy/Men (1/1)

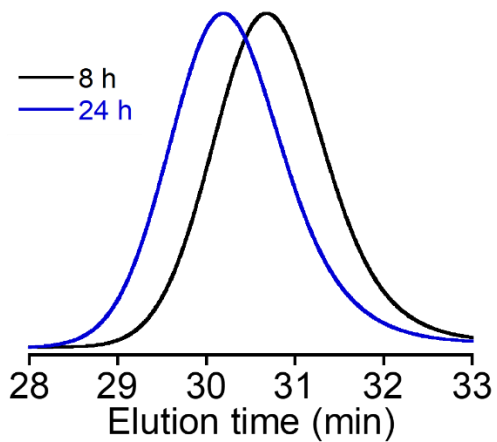

(b) Tdc/Men (1/2)

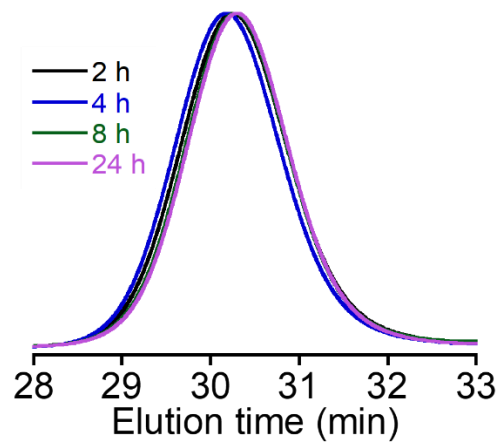

(c) Thy/Cou (1/1)

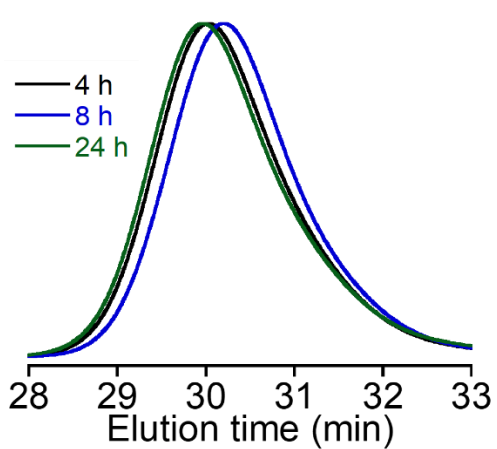

(d) DMF

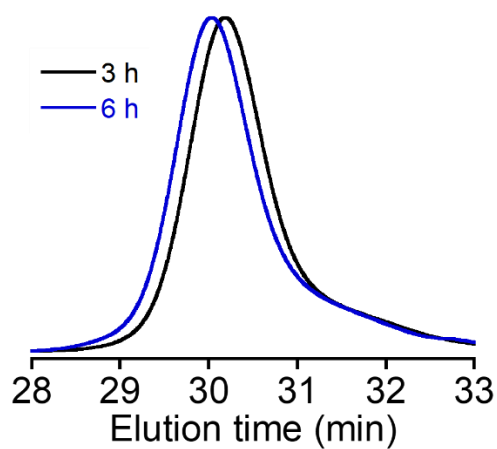

**Figure S6.** SEC curves (RI traces, DMF, LiBr) of PNIPAMs obtained by thermally-induced RAFT polymerization of NIPAM in (a-c) NADESs and (d) DMF (Table S4).

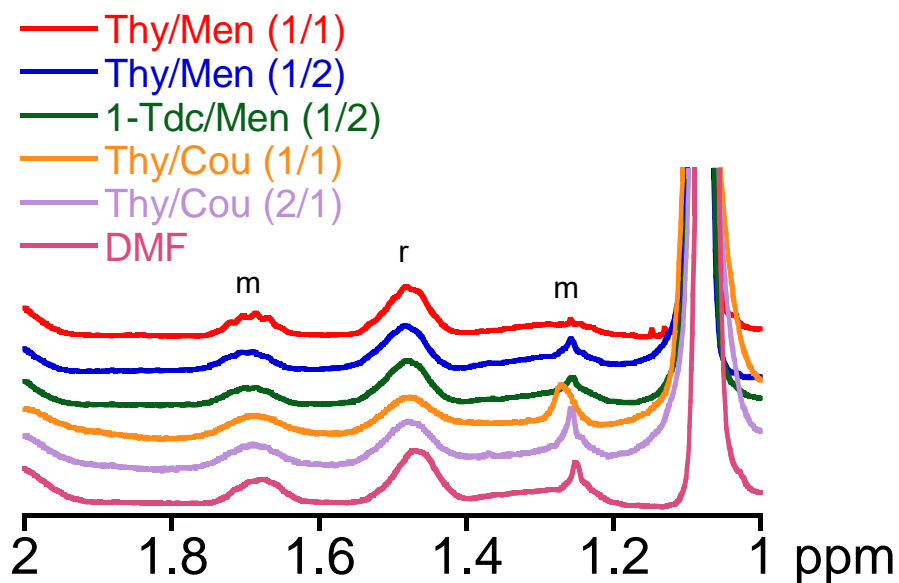

**Figure S7.**  $^1\text{H}$  NMR spectra ( $\text{DMSO-}d_6$ ,  $150\text{ }^\circ\text{C}$ ) of PNIPAMs obtained by thermally-induced RAFT polymerization of NIPAM in hydrophobic NADESs (Runs 5, 10, 15, 20, 25, 27 in Table S4).

**Table S5.** Summary of tacticity of PNIPAMs prepared in different NADESs

| Solvent       | meso (m) | racemo (r) |
|---------------|----------|------------|
| Thy/Men (1/1) | 48       | 52         |
| Thy/Men (1/2) | 51       | 49         |
| Tdc/Men (1/2) | 49       | 51         |
| Thy/Cou (1/1) | 54       | 46         |
| Thy/Cou (2/1) | 54       | 46         |
| DMF           | 54       | 46         |

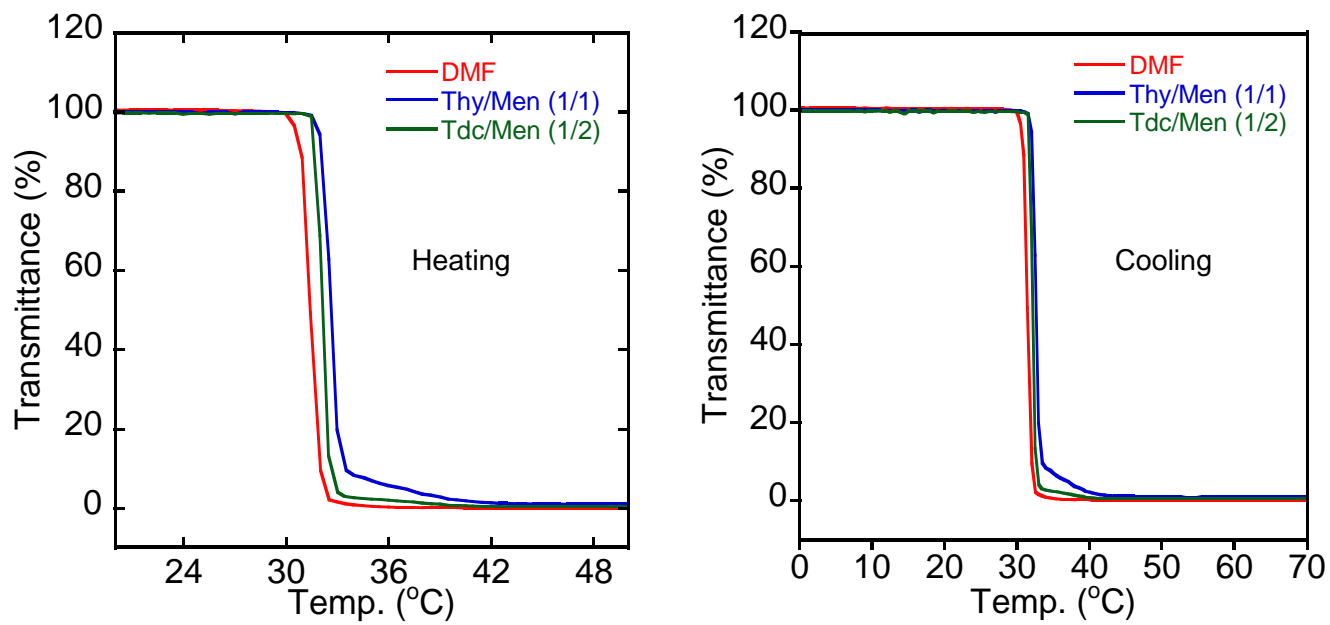

**Figure 8.** Temperature dependence of the transmittance at 500 nm of aqueous solutions of PNIPAMs prepared in NADESs, Thy/Men (1/1) and Tdc/Men (1/2), and DMF.

**Table S6.** Photo-induced free radical polymerization of NIPAM under UV light (Hg lamp) in various NADESs <sup>a)</sup>

| Run | Solvent       | Conv. <sup>b)</sup><br>(%) | Yield <sup>c)</sup><br>(%) | $M_n$ <sup>d)</sup><br>(SEC) | $M_w/M_n$ <sup>d)</sup><br>(SEC) |
|-----|---------------|----------------------------|----------------------------|------------------------------|----------------------------------|
| 1   | Thy/Men (1/1) | 96                         | 30                         | 83000                        | 1.61                             |
| 2   | Thy/Men (1/2) | 99                         | 63                         | 68000                        | 2.03                             |
| 3   | Tdc/Men (1/2) | 99                         | 60                         | 190000                       | 2.06                             |
| 4   | Thy/Cou (1/1) | <1                         | -                          | -                            | -                                |
| 5   | Thy/Cou (2/1) | <1                         | -                          | -                            | -                                |

<sup>a)</sup> Polymerization with DMPA at room temperature for 90 min under air.  $[I]_0/[M]_0 = 1/100$ .  $[M] = 30$  wt%. <sup>b)</sup> Calculated by  $^1\text{H}$  NMR in  $\text{DMSO-}d_6$ . <sup>c)</sup> Diethyl ether-insoluble part. <sup>d)</sup> Measured by size-exclusion chromatography (SEC) using polystyrene standard in *N,N*-dimethylformamide (10 mM LiBr).

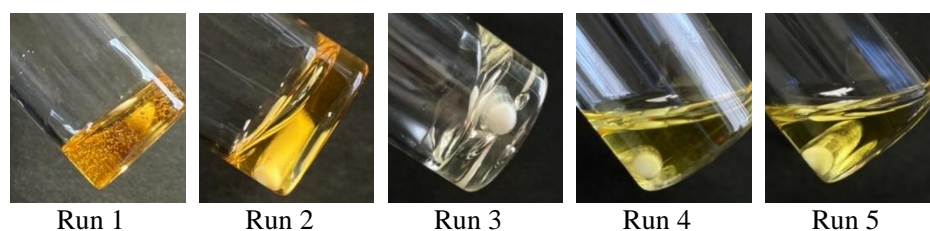

**Figure S9.** Appearance of polymerized products obtained by photo-induced free radical polymerization of NIPAM in various NADESs (see Table S6).



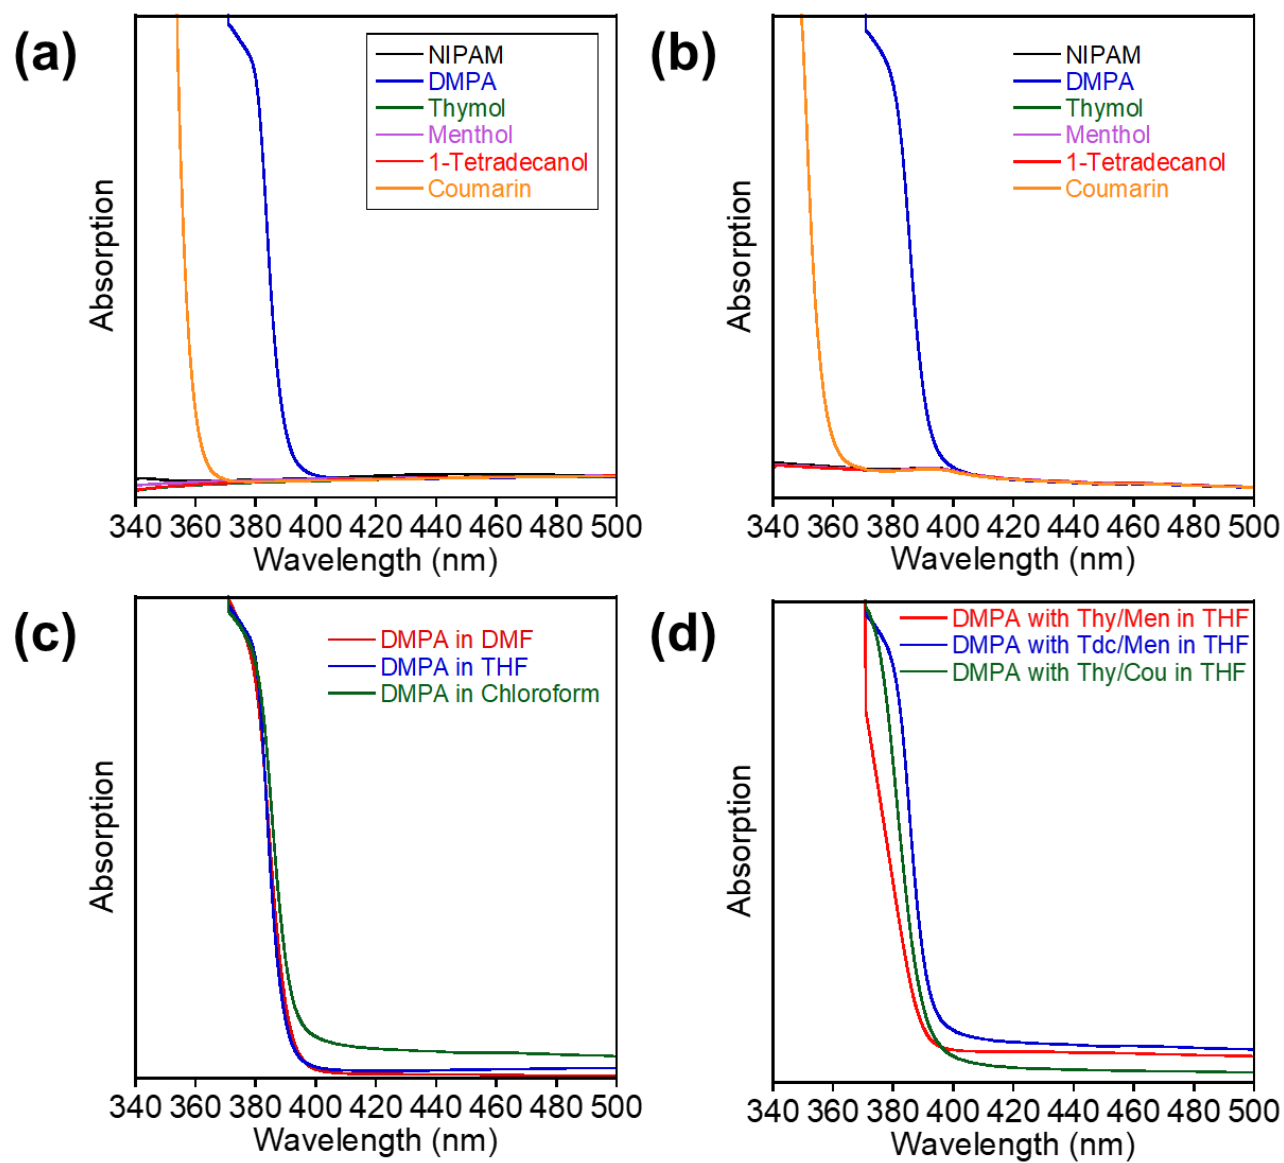

**Figure S10.** UV-vis spectra of (a,b) NADES components, monomer (NIPAM), and photoinitiator (DMPA) in (a) CHCl<sub>3</sub> and (b) THF. UV-vis spectra of (c) DMPA in different solvents and (d) DMPA with NADESs in THF.

**Table S7.** Photo-induced free radical and RAFT polymerization of NIPAM in Thy/Men (1/1) NADES using different lights <sup>a)</sup>

| Run | [I] <sub>0</sub> /[CTA] <sub>0</sub> /[M] <sub>0</sub><br>(light) | Time<br>(min) | Conv. <sup>b)</sup><br>(%) | <i>M<sub>n</sub></i> <sup>b)</sup><br>(theo) | <i>M<sub>n</sub></i> <sup>c)</sup><br>(SEC) | <i>M<sub>w</sub></i> / <i>M<sub>n</sub></i> <sup>c)</sup><br>(SEC) |
|-----|-------------------------------------------------------------------|---------------|----------------------------|----------------------------------------------|---------------------------------------------|--------------------------------------------------------------------|
| 1   | 1/0/100                                                           | 1             | 0                          | -                                            | -                                           | -                                                                  |
| 2   | (Hg lamp, 6.0<br>mW/cm <sup>2</sup> )                             | 5             | 81                         | -                                            | 32000                                       | 2.64                                                               |
| 3   |                                                                   | 10            | 94                         | -                                            | 34000                                       | 2.20                                                               |
| 4   | 1/0/100                                                           | 1             | 99                         | -                                            | 24000                                       | 2.33                                                               |
| 5   | (LED-UV light,<br>330 mW/cm <sup>2</sup> )                        | 2             | 99                         | -                                            | 24000                                       | 2.13                                                               |
| 6   |                                                                   | 3             | 99                         | -                                            | 25000                                       | 2.32                                                               |
| 7   |                                                                   | 1             | 0                          | -                                            | -                                           | -                                                                  |
| 8   |                                                                   | 2             | 12                         | 1700                                         | -                                           | -                                                                  |
| 9   | 1/1/100                                                           | 3             | 70                         | 8000                                         | 14000                                       | 1.29                                                               |
| 10  | (LED-UV light,<br>330 mW/cm <sup>2</sup> )                        | 5             | 86                         | 10000                                        | 16000                                       | 1.34                                                               |
| 11  |                                                                   | 10            | 92                         | 11000                                        | 16000                                       | 1.38                                                               |
| 12  |                                                                   | 30            | 93                         | 11000                                        | 16000                                       | 1.43                                                               |

<sup>a)</sup> Polymerization with DMPA at room temperature under air. [M] = 30 wt%. <sup>b)</sup> Calculated by <sup>1</sup>H NMR in DMSO-*d*<sub>6</sub>. <sup>c)</sup> Diethyl ether-insoluble part. <sup>d)</sup> Measured by size-exclusion chromatography (SEC) using polystyrene standard in *N,N*-dimethylformamide (DMF, 10 mM LiBr).

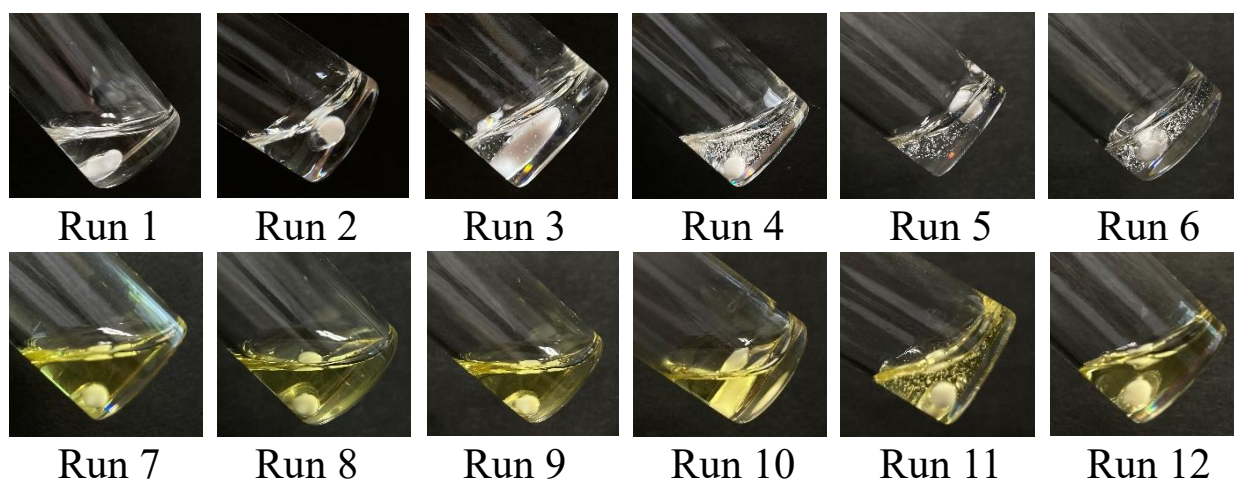

**Figure S11.** Appearance of polymerized products obtained by free radical and RAFT polymerizations of NIPAM in Thy/Men (1/1) NADES (Table S7).

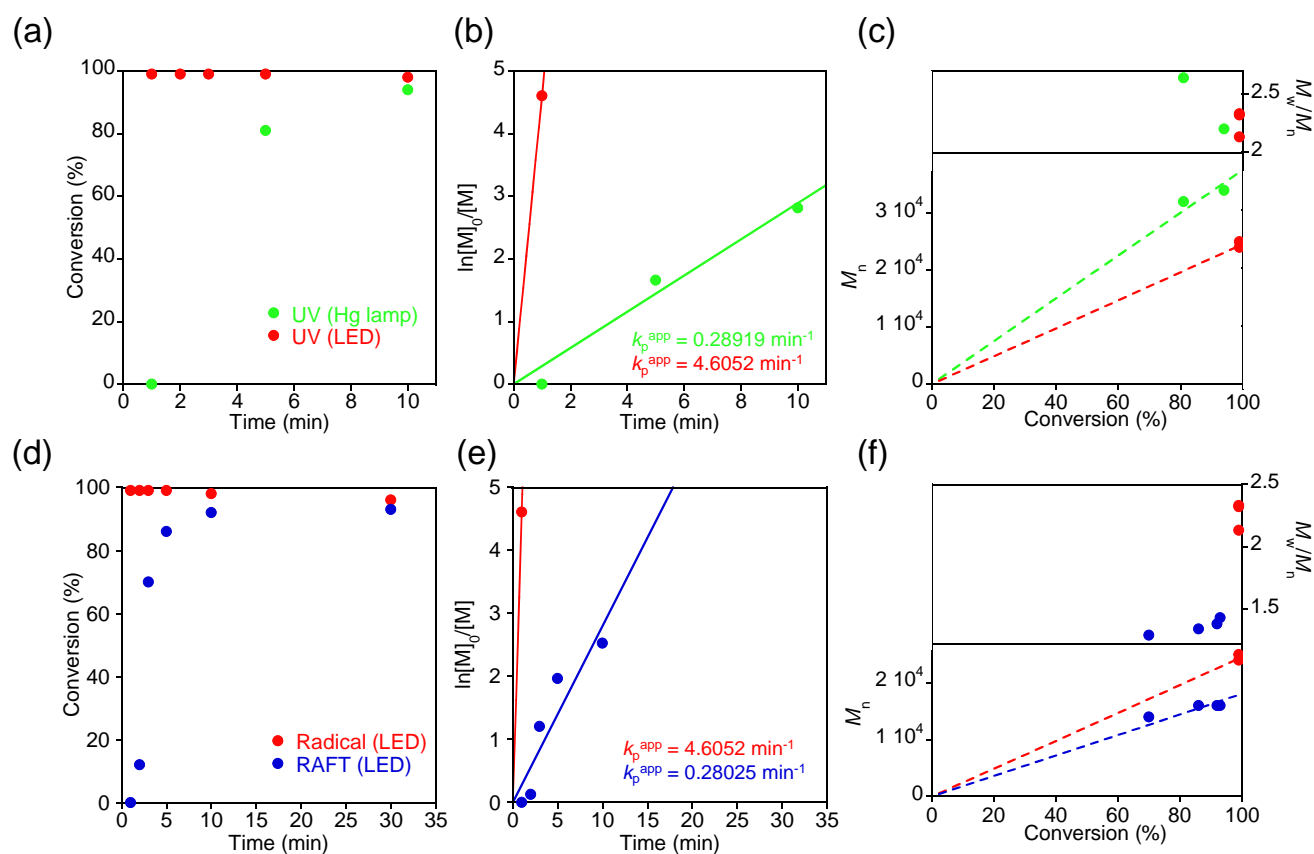

**Figure S12.** (a) Time-conversion and (b) first-order kinetic plots for the photo-induced free radical polymerization of NIPAM in Thy/Men (1/1) NADES under different UV lights (Hg lamp and LED). (c) Number-average molecular weight and polydispersity as a function of conversion. (d) Time-conversion and (e) first-order kinetic plots for the photo-induced free radical and RAFT polymerizations of NIPAM in Thy/Men (1/1) NADES under LED-UV light. (f) Number-average molecular weight and polydispersity as a function of conversion.

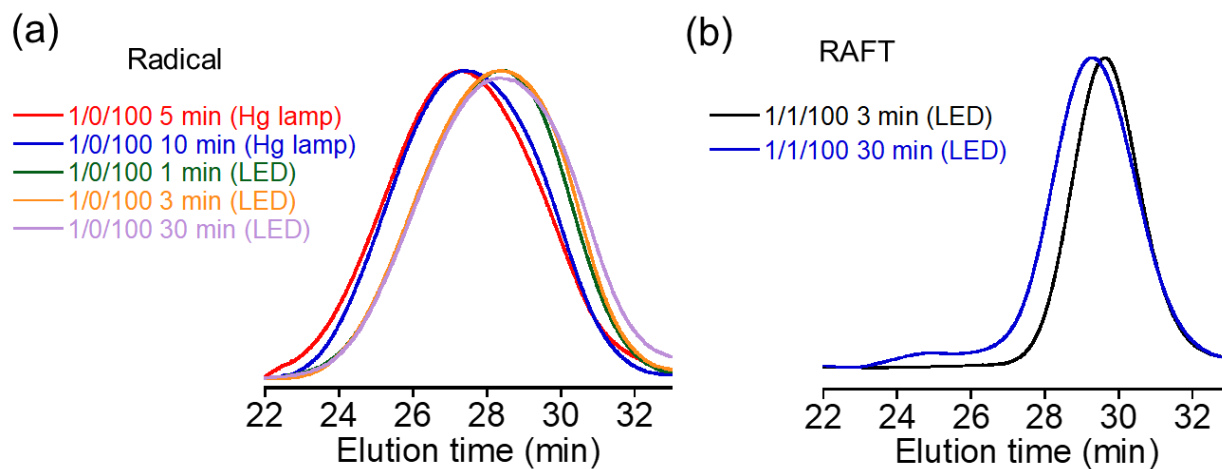

**Figure S13.** SEC curves (RI traces, DMF, LiBr) of PNIPAMs obtained by photo-induced (a) free radical and (b) RAFT polymerizations under air in Thy/Men (1/1) NADES (see Table S7 for detailed conditions).

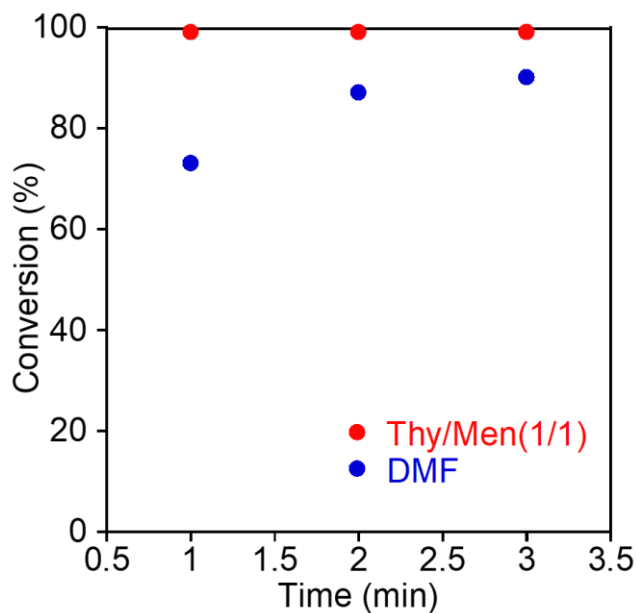

**Figure S14.** Time-conversion plots of photo-induced free radical polymerization of NIPAM under LED-UV light in Thy/Men (1/1) NADES and DMF.

**Table S8.** Photo-induced RAFT polymerization of NIPAM under UV light (LED-UV) in Tdc/Men (1/2) NADES <sup>a)</sup>

| Run | Time<br>(min) | Conv. <sup>b)</sup><br>(%) | $M_n$ <sup>b)</sup><br>(theo) | $M_n$ <sup>c)</sup><br>(SEC) | $M_w/M_n$ <sup>c)</sup><br>(SEC) |
|-----|---------------|----------------------------|-------------------------------|------------------------------|----------------------------------|
| 1   | 1             | 0                          | -                             | -                            | -                                |
| 2   | 2             | 67                         | 8000                          | 19000                        | 1.38                             |
| 3   | 3             | 88                         | 10000                         | 21000                        | 1.51                             |
| 4   | 5             | 95                         | 11000                         | 21000                        | 1.58                             |
| 5   | 10            | 99                         | 12000                         | 19000                        | 1.61                             |
| 6   | 30            | 98                         | 11000                         | 17000                        | 1.51                             |

<sup>a)</sup> Polymerization with DMPA at room temperature under air.  $[I]_0/[CTA]_0/[M]_0 = 1/1/100$ .  $[M] = 30$  wt%.

<sup>b)</sup> Calculated by <sup>1</sup>H NMR in DMSO-*d*<sub>6</sub>. <sup>c)</sup> Measured by size-exclusion chromatography (SEC) using polystyrene standard in *N,N*-dimethylformamide (10 mM LiBr).

**Table S9.** Photo-induced RAFT polymerization of NIPAM under UV light (LED light) in hydrophobic NADESs <sup>a)</sup>

| Run | Solvent       | [I] <sub>0</sub> /[CTA] <sub>0</sub> /[M] <sub>0</sub> | Conv. <sup>b)</sup> /Yield <sup>c)</sup><br>(%) | <i>M<sub>n</sub></i> <sup>b)</sup><br>(theory) | <i>M<sub>n</sub></i> <sup>d)</sup><br>(SEC) | <i>M<sub>w</sub></i> / <i>M<sub>n</sub></i> <sup>d)</sup><br>(SEC) |
|-----|---------------|--------------------------------------------------------|-------------------------------------------------|------------------------------------------------|---------------------------------------------|--------------------------------------------------------------------|
| 1   |               | 1/1/100                                                | >99/88                                          | 11000                                          | 26000                                       | 1.39                                                               |
| 2   | Thy/Men (1/1) | 1/1/200                                                | >99/91                                          | 22000                                          | 28000                                       | 1.36                                                               |
| 3   |               | 1/1/500                                                | >99/86                                          | 56000                                          | 44000                                       | 1.54                                                               |
| 4   |               | 1/1/1000                                               | >99/75                                          | 110000                                         | 69000                                       | 1.76                                                               |
| 5   |               | 1/1/100                                                | 95/72                                           | 11000                                          | 22000                                       | 1.36                                                               |
| 6   | Tdc/Men (1/2) | 1/1/200                                                | >99/79                                          | 22000                                          | 30000                                       | 1.34                                                               |
| 7   |               | 1/1/500                                                | >99/82                                          | 57000                                          | 50000                                       | 1.56                                                               |
| 8   |               | 1/1/1000                                               | 96/89                                           | 110000                                         | 60000                                       | 1.94                                                               |

<sup>a)</sup> Polymerization with DMPA at room temperature for 30 min under air. [M] = 30 wt%. <sup>b)</sup> Calculated by <sup>1</sup>H NMR in DMSO-*d*<sub>6</sub>. <sup>c)</sup> Diethyl ether-insoluble part. <sup>d)</sup> Measured by size-exclusion chromatography (SEC) using polystyrene standards in *N,N*-dimethylformamide (DMF, 10 mM LiBr).

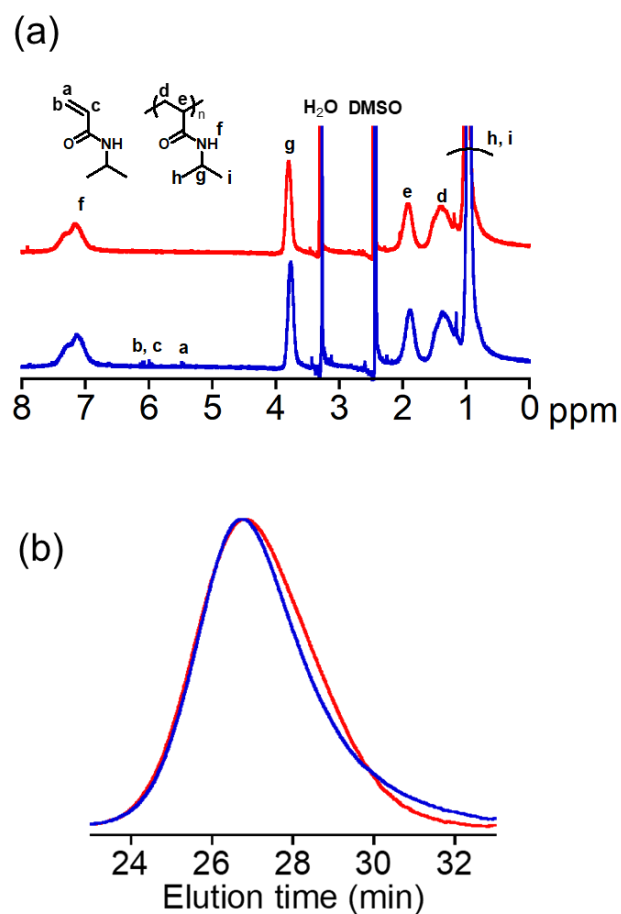

**Figure S15.** (a)  $^1\text{H}$  NMR spectra and (b) SEC curves (RI detector, DMF, LiBr) of PNIPAMs obtained by photo-induced RAFT polymerization under air in Tdc/Men (1/2) NADES, which was purified by reprecipitation into diethyl ether, followed by filtration (red line) and by mixing with a distilled water by ultrasonicated (40 kHz) at 30 °C for 5 min, followed by filtration (blue line).

**Table S10.** Characteristics of PNIPAMs obtained by different purification processes <sup>a)</sup>

| Run | Conv. <sup>b)</sup><br>(%) | Yield<br>(%)     | $M_n$ <sup>b)</sup><br>(theo) | $M_n$ <sup>c)</sup><br>(SEC) | $M_w/M_n$ <sup>c)</sup><br>(SEC) |
|-----|----------------------------|------------------|-------------------------------|------------------------------|----------------------------------|
| 1   | 99                         | 82 <sup>d)</sup> | 56000                         | 47000                        | 1.64                             |
| 2   | 99                         | 57 <sup>e)</sup> | 56000                         | 43000                        | 1.80                             |

<sup>a)</sup> Polymerization with DMPA at room temperature for 10 min under LED-UV light (365 nm, 330 mW/cm<sup>2</sup>) in Tdc/Men (1/2). [M] = 30 wt%. <sup>b)</sup> Calculated by  $^1\text{H}$  NMR in DMSO-*d*<sub>6</sub>. <sup>c)</sup> Measured by size-exclusion chromatography (SEC) using polystyrene standard in *N,N*-dimethylformamide (DMF, 10 mM LiBr). <sup>d)</sup> Diethyl ether-insoluble part. <sup>e)</sup> Water-soluble part.

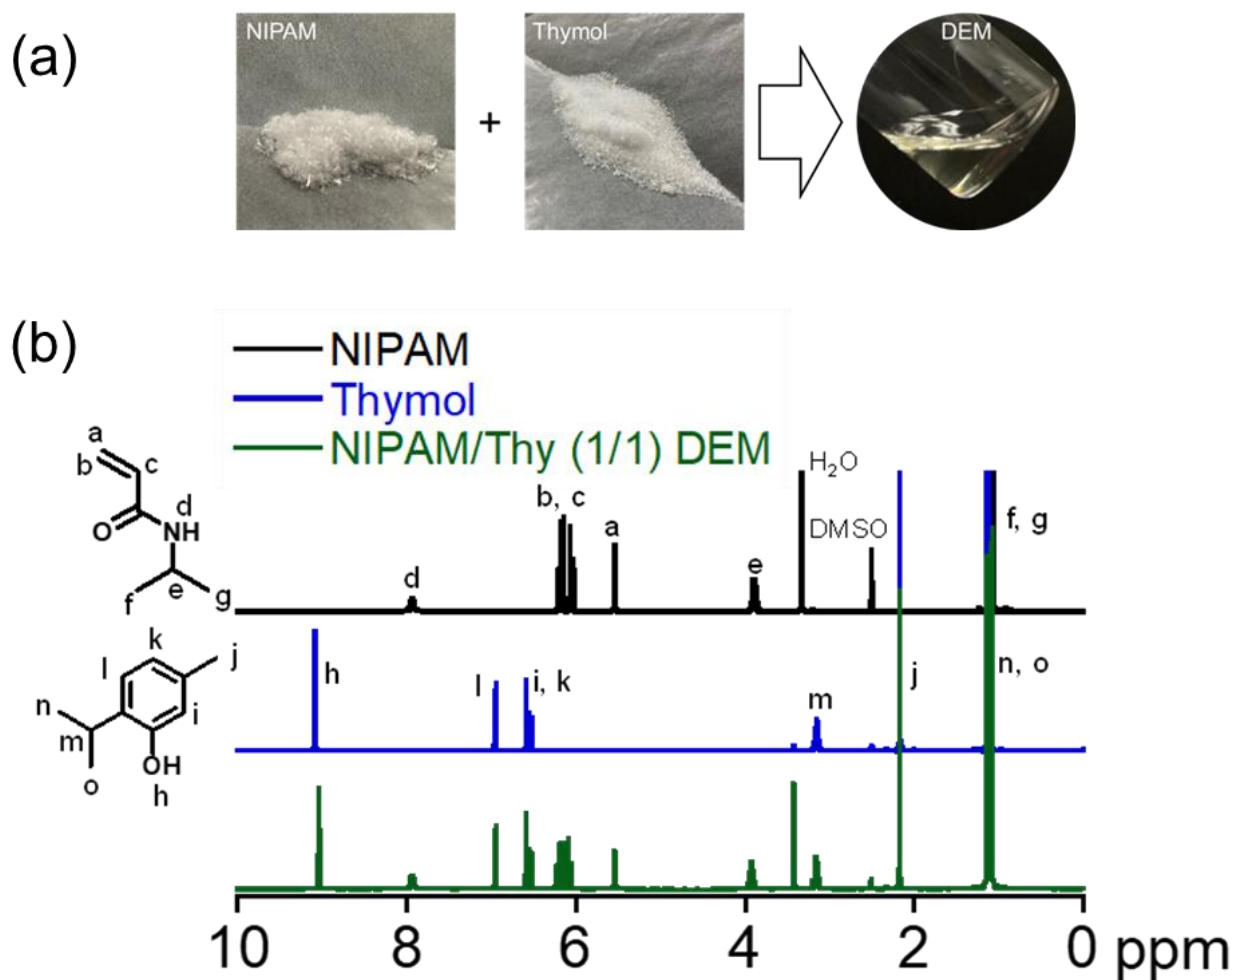

**Figure S16.** (a) Appearance of NIPAM (solid), thymol (solid), and NIPAM/Thy NADEM (liquid), and (b)  $^1\text{H}$  NMR spectra of NIPAM, thymol and NIPAM/Thy (1/1) NADEM in  $\text{DMSO-}d_6$ .



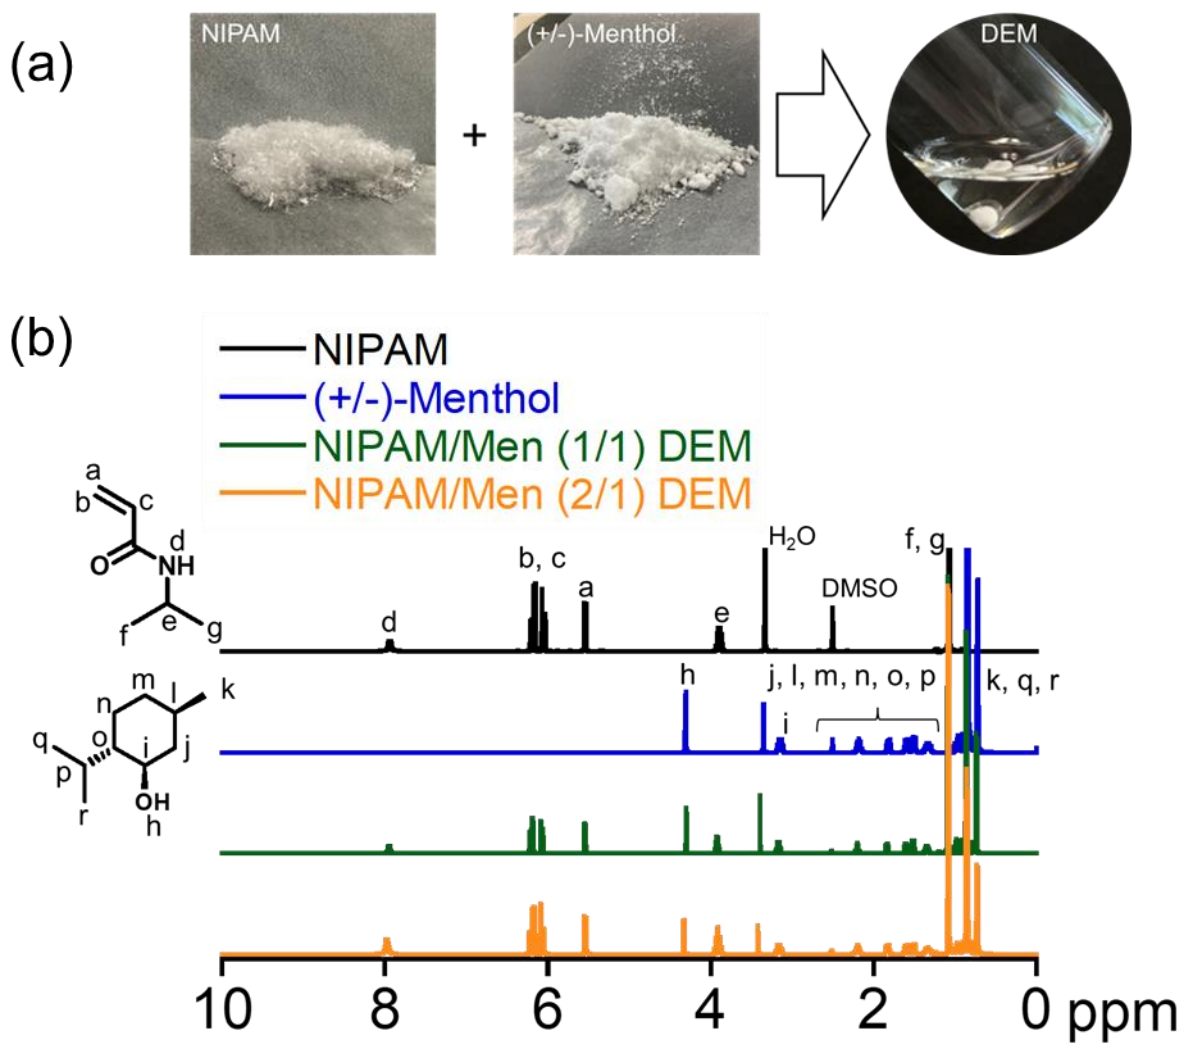

**Figure S17.** (a) Appearance of NIPAM (solid), ( $\pm$ )-menthol (solid), and NIPAM/Men (1/1) NADEM (liquid), and (b)  $^1\text{H}$  NMR spectra of NIPAM, ( $\pm$ )-menthol, and NIPAM/Men (1/1 and 2/1) NADEMs in  $\text{DMSO-}d_6$ .

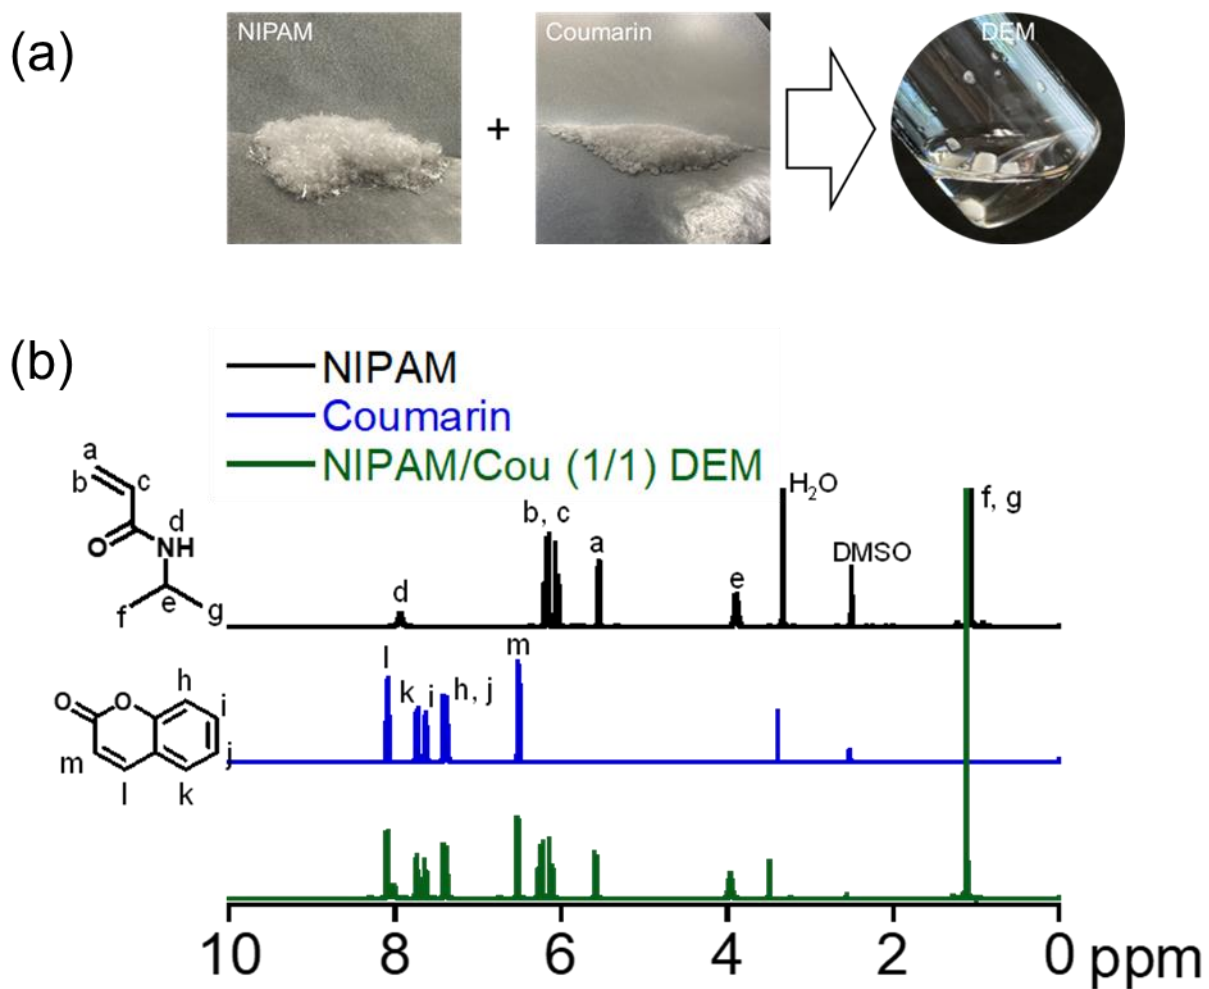

**Figure S18.** (a) Appearance of NIPAM (solid), coumarin (solid), and NIPAM/Cou (1/1) NADEM (liquid), and (b)  $^1\text{H}$  NMR spectra of NIPAM, coumarin, and NIPAM/Cou (1/1) NADEM in  $\text{DMSO-}d_6$ .

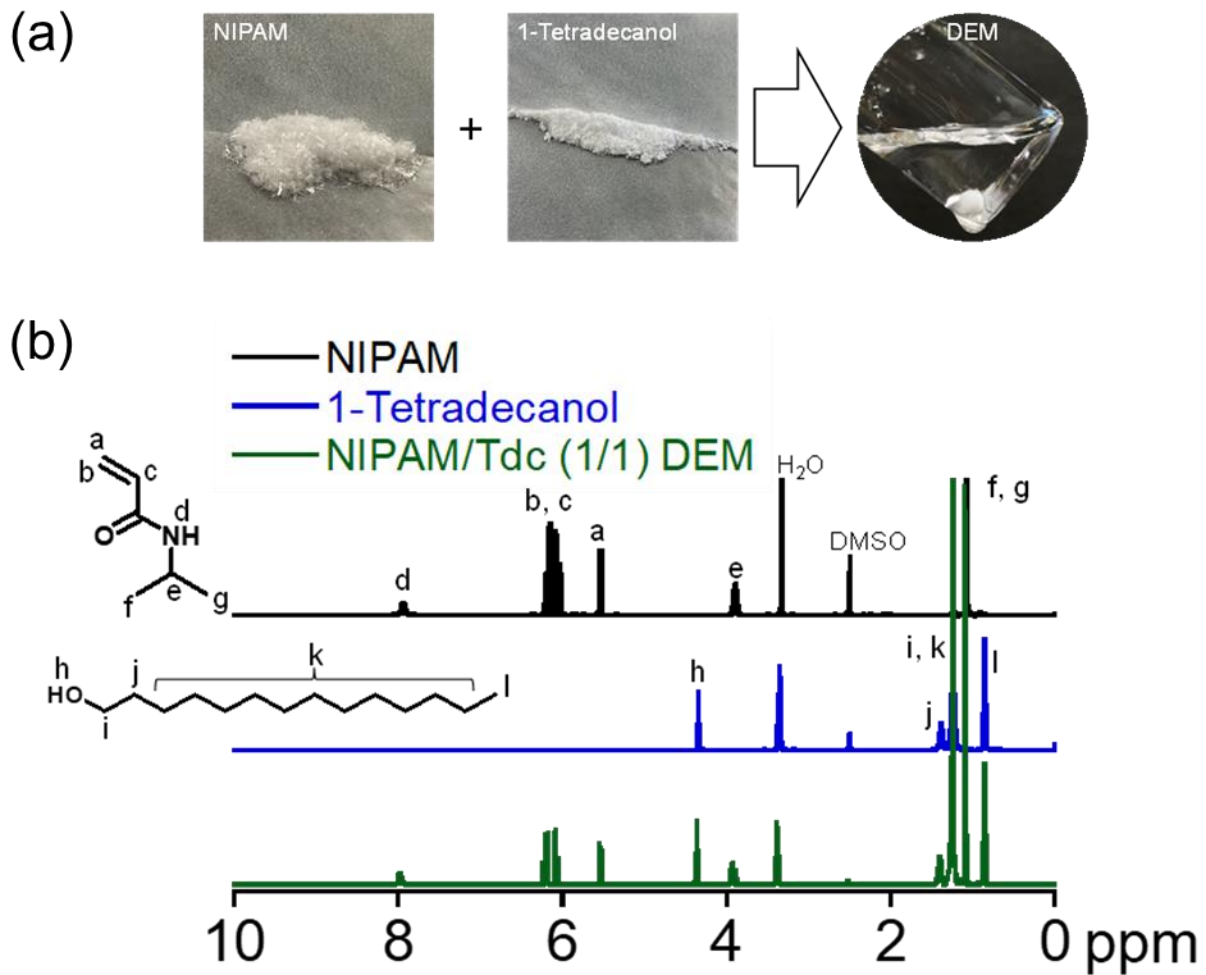

**Figure S19.** (a) Appearance of NIPAM (solid), 1-tetradecanol (solid), and NIPAM/Tdc (1/1) NADEM (liquid), and (b)  $^1\text{H}$  NMR spectra of NIPAM, 1-tetradecanol, and NIPAM/Tdc (1/1) NADEM in  $\text{DMSO-}d_6$ .

**Table S11.** Synthesis of NIPAM-based NADEMs and their appearances

| Run                                                                                                            | Molar ratio | Appearance                                                                           |                                                                                       |
|----------------------------------------------------------------------------------------------------------------|-------------|--------------------------------------------------------------------------------------|---------------------------------------------------------------------------------------|
|                                                                                                                |             | Reaction temperature                                                                 | 1 day later <sup>d)</sup>                                                             |
| NIPAM/Thy <sup>a)</sup><br>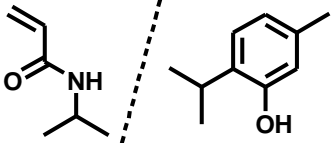   | 1/1         |    |    |
| NIPAM/Men <sup>b)</sup><br>   | 1/1         |    |    |
| NIPAM/Cou <sup>c)</sup><br>   | 1/1         |   |   |
| NIPAM/Tdc <sup>c)</sup><br> | 1/1         |  |  |

<sup>a)</sup> Mixing at 25 °C for 10 min. <sup>b)</sup> Mixing at 30 °C for 30 min. <sup>c)</sup> Mixing at 50 °C for 30 min. <sup>d)</sup> At room temperature.

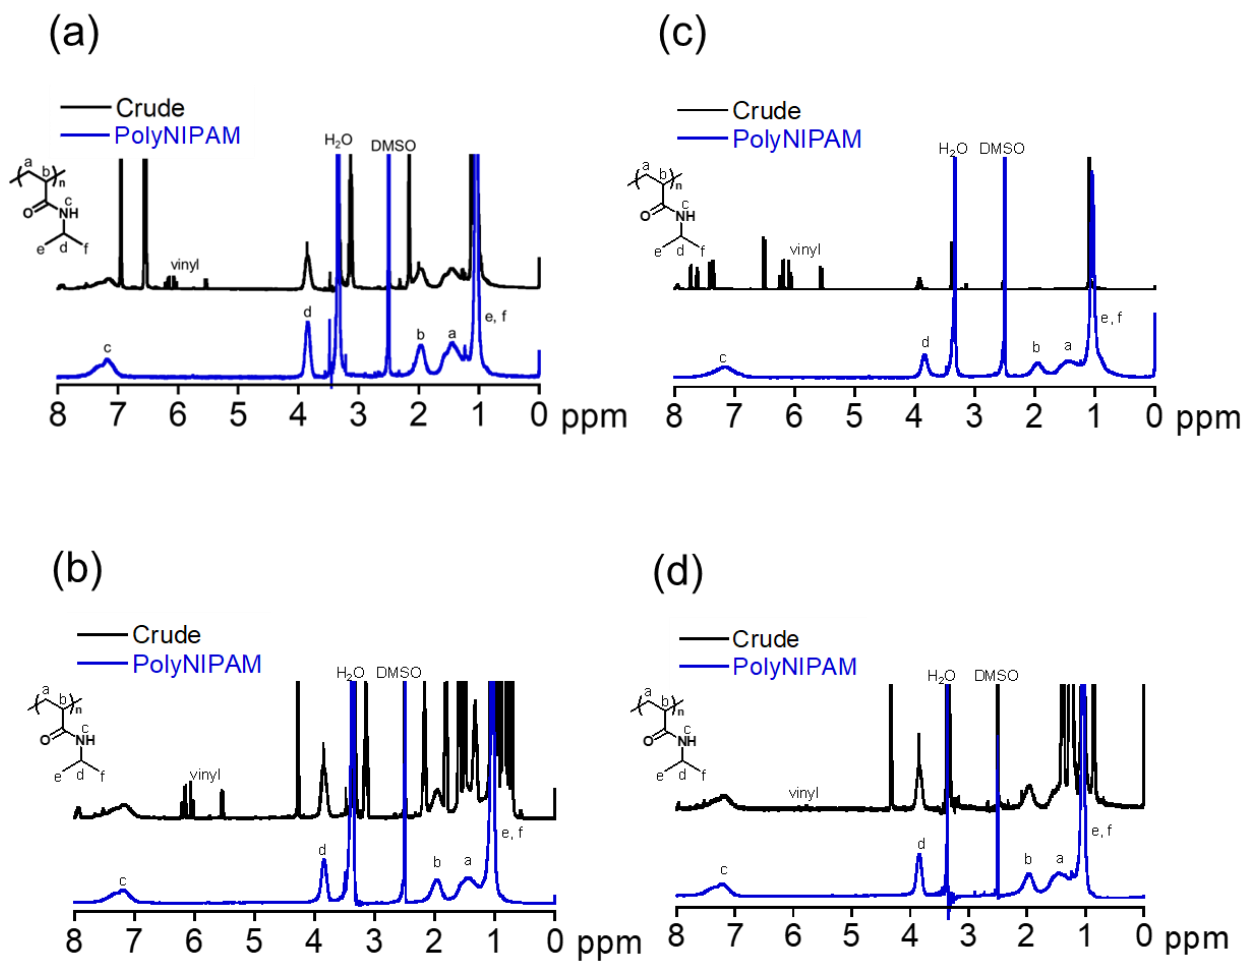

**Figure S20.**  $^1\text{H}$  NMR spectra ( $\text{DMSO-}d_6$ ) of crude products (black line) obtained by photoinduced radical polymerization of (a) NIPAM/Thy (1/1), (b) NIPAM/Men (1/1), (c) NIPAM/Cou (1/1), and (d) NIPAM/Tdc (1/1), and their purified product, PNIPAM, by reprecipitation into diethyl ether.

PNIPAMs obtained from

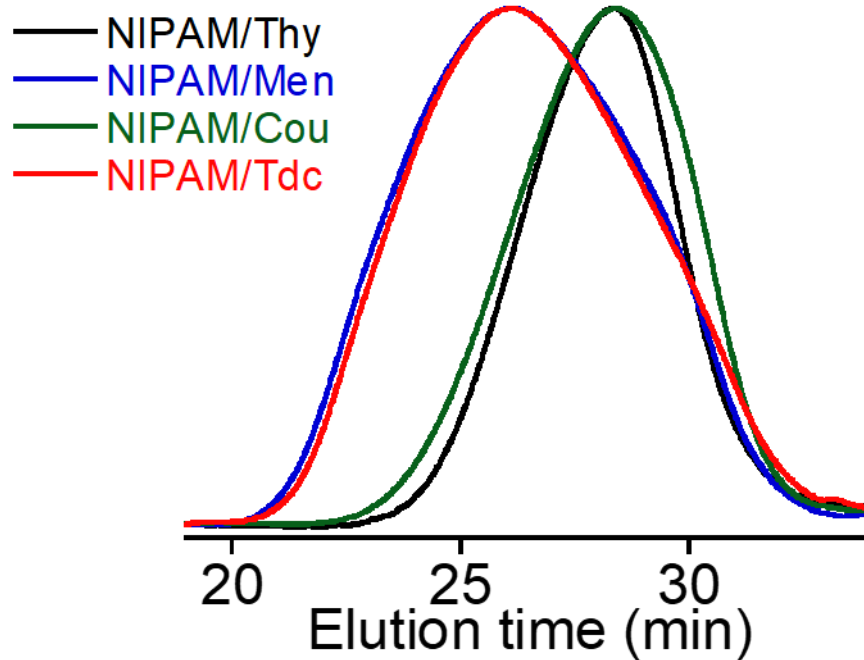

**Figure S21.** SEC curves (RI traces, DMF, LiBr) of PNIPAMs obtained by photo-induced polymerization of NIPAM-based NADEMs (see Table 2 for detailed polymerization conditions).

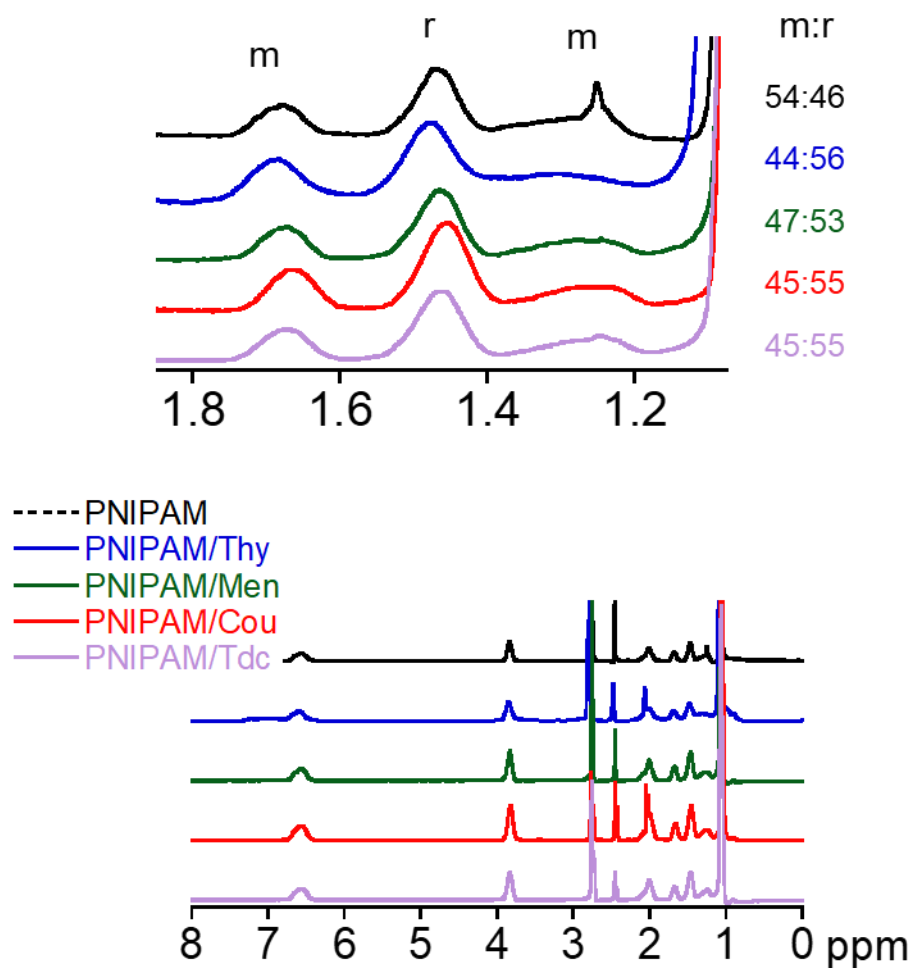

**Figure S22.**  $^1\text{H}$  NMR spectra (DMSO- $d_6$ , 150  $^\circ\text{C}$ ) of PNIPAMs obtained by photo-induced polymerization of NIPAM-based NADEMs (see Table 2 for detailed polymerization conditions).

**Table S12.** Photo-induced free radical polymerization of NADEMs under UV light (LED-UV) <sup>a)</sup>

| Run | NADEM               | Time<br>(s) | Conv. <sup>b)</sup><br>(%) | $M_n$ <sup>c)</sup><br>(SEC) | $M_w/M_n$ <sup>c)</sup><br>(SEC) |
|-----|---------------------|-------------|----------------------------|------------------------------|----------------------------------|
| 1   |                     | 1           | 24                         | 59000                        | 3.47                             |
| 2   |                     | 2           | 36                         | 64000                        | 3.06                             |
| 3   | NIPAM/Men           | 3           | 42                         | 52000                        | 3.34                             |
| 4   | (1/1)               | 4           | 43                         | 46000                        | 3.16                             |
| 5   |                     | 5           | 55                         | 54000                        | 3.09                             |
| 6   |                     | 10          | 91                         | 53000                        | 3.48                             |
| 7   |                     | 1           | 29                         | 49000                        | 2.67                             |
| 8   |                     | 2           | 28                         | 48000                        | 2.90                             |
| 9   | NIPAM/Tdc           | 3           | 45                         | 45000                        | 2.90                             |
| 10  | (1/1) <sup>d)</sup> | 4           | 63                         | 41000                        | 3.36                             |
| 11  |                     | 5           | 73                         | 41000                        | 3.17                             |
| 12  |                     | 10          | 99                         | 64000                        | 2.87                             |

<sup>a)</sup> Polymerization with DMPA at room temperature under air.  $[I]_0/[M]_0 = 1/100$ . <sup>b)</sup> Calculated by <sup>1</sup>H NMR in DMSO-*d*<sub>6</sub>. <sup>c)</sup> Measured by size-exclusion chromatography (SEC) using polystyrene standard in *N,N*-dimethylformamide (DMF, 10 mM LiBr). <sup>d)</sup> Polymerization at approximately 50 °C.



**Table S13.** Photo-induced RAFT polymerization of NADEMs under UV light (LED-UV) <sup>a)</sup>

| Run | NADEM                            | Time<br>(min) | Conv. <sup>b)</sup><br>(%) | $M_n$ <sup>b)</sup><br>(theo) | $M_n$ <sup>c)</sup><br>(SEC) | $M_w/M_n$ <sup>c)</sup><br>(SEC) |
|-----|----------------------------------|---------------|----------------------------|-------------------------------|------------------------------|----------------------------------|
| 1   |                                  | 1             | 33                         | 4100                          | 13000                        | 1.39                             |
| 2   | NIPAM/Men<br>(1/1)               | 2             | 61                         | 7200                          | 16000                        | 1.41                             |
| 3   |                                  | 5             | 68                         | 8000                          | 17000                        | 1.40                             |
| 4   |                                  | 10            | 87                         | 10000                         | 16000                        | 1.43                             |
| 5   |                                  | 20            | 94                         | 11000                         | 15000                        | 1.53                             |
| 6   |                                  |               | 1                          | 77                            | 9000                         | 12000                            |
| 7   | NIPAM/Tdc<br>(1/1) <sup>d)</sup> | 2             | 95                         | 11000                         | 12000                        | 1.39                             |
| 8   |                                  | 5             | 99                         | 12000                         | 15000                        | 1.39                             |
| 9   |                                  | 10            | 99                         | 12000                         | 14000                        | 1.49                             |
| 10  |                                  | 20            | 99                         | 12000                         | 15000                        | 1.44                             |

<sup>a)</sup> Polymerization with DMPA at room temperature under air.  $[I]_0/[CTA]_0/[M]_0 = 1/1/100$ . <sup>b)</sup> Calculated by <sup>1</sup>H NMR in DMSO-*d*<sub>6</sub>. <sup>c)</sup> Measured by size-exclusion chromatography (SEC) using polystyrene standards in *N,N*-dimethylformamide (DMF, 10 mM LiBr). <sup>d)</sup> Polymerization at approximately 50 °C.

**Table S14.** Photo-induced RAFT polymerization of NADEMs under UV light (LED-UV) <sup>a)</sup>

| Run | NADEM               | [I] <sub>0</sub> /[CTA] <sub>0</sub> /[M] <sub>0</sub> | Conv. <sup>b)</sup><br>/Yield <sup>c)</sup><br>(%) | <i>M<sub>n</sub></i> <sup>b)</sup><br>(theory) | <i>M<sub>n</sub></i> <sup>d)</sup><br>(SEC) | <i>M<sub>w</sub></i> / <i>M<sub>n</sub></i> <sup>d)</sup><br>(SEC) |
|-----|---------------------|--------------------------------------------------------|----------------------------------------------------|------------------------------------------------|---------------------------------------------|--------------------------------------------------------------------|
| 1   |                     | 1/1/100                                                | >99/83                                             | 11000                                          | 17000                                       | 1.40                                                               |
| 2   | NIPAM/Men           | 1/1/200                                                | >99/80                                             | 22000                                          | 28000                                       | 1.57                                                               |
| 3   | (1/1)               | 1/1/500                                                | >99/91                                             | 55000                                          | 43000                                       | 1.71                                                               |
| 4   |                     | 1/1/1000                                               | 98/88                                              | 110000                                         | 52000                                       | 2.20                                                               |
| 5   |                     | 1/1/100                                                | 94/68                                              | 11000                                          | 15000                                       | 1.43                                                               |
| 6   | NIPAM/Tdc           | 1/1/200                                                | 94/74                                              | 21000                                          | 22000                                       | 1.69                                                               |
| 7   | (1/1) <sup>e)</sup> | 1/1/500                                                | 92/86                                              | 52000                                          | 37000                                       | 1.78                                                               |
| 8   |                     | 1/1/1000                                               | 94/78                                              | 11000                                          | 56000                                       | 1.87                                                               |

<sup>a)</sup> Polymerization with DMPA at room temperature for 2 min under air. [M] = 30 wt%. <sup>b)</sup> Calculated by <sup>1</sup>H NMR in DMSO-*d*<sub>6</sub>. <sup>c)</sup> Diethyl ether-insoluble part. <sup>d)</sup> Measured by size-exclusion chromatography (SEC) using polystyrene standards in *N,N*-dimethylformamide (DMF, 10 mM LiBr). <sup>e)</sup> Polymerization at approximately 50 °C.

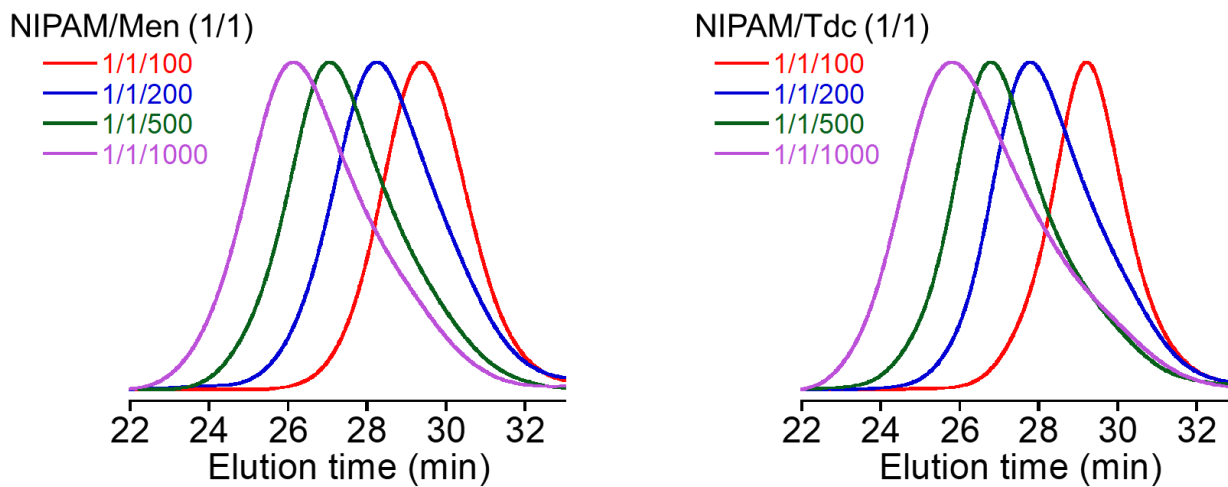

**Figure S23.** SEC curves (RI detector, DMF, LiBr) of PNIPAMs obtained by photo-induced RAFT polymerization of NIPAM-based NADEMs at different  $[DMPA]_0/[CTA]_0/[NADEM]_0$  ratios.

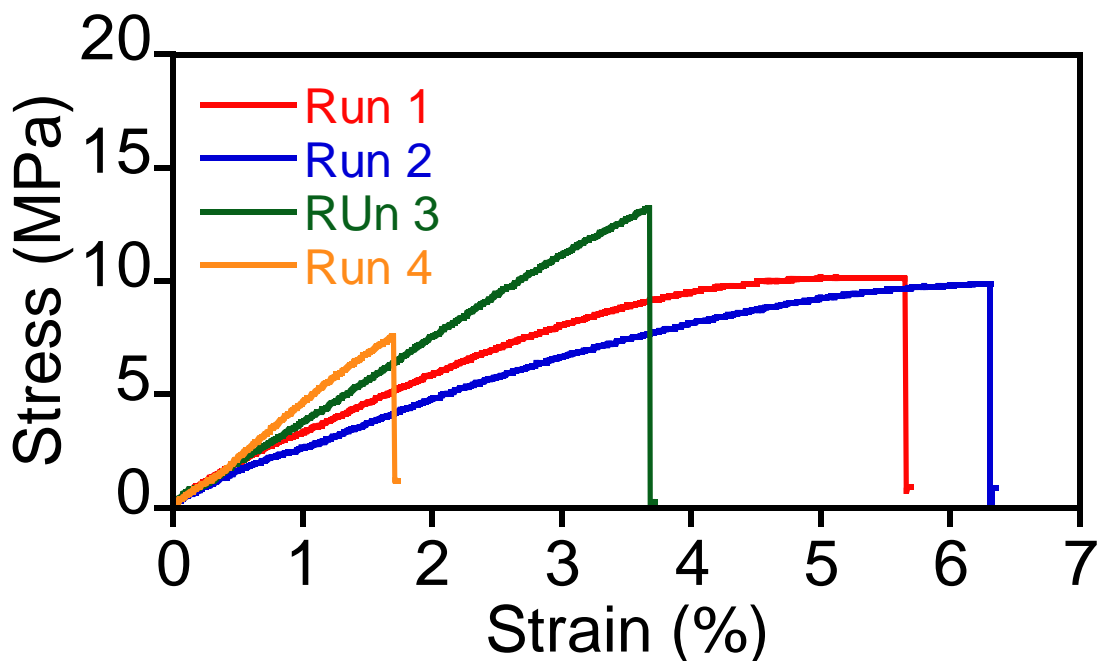

**Figure S24.** Stress–strain curves of polymerized products prepared from NIPAM/Men (3/2).

**Table S15.** Mechanical properties of the polymerized products prepared from NIPAM/Men (3/2) <sup>a)</sup>

| Run     | Young's modulus <sup>b)</sup><br>(MPa) | Maximum strength<br>(MPa) | Maximum strain<br>(%) | Modulus of toughness <sup>c)</sup><br>(MJ/m <sup>3</sup> ) |
|---------|----------------------------------------|---------------------------|-----------------------|------------------------------------------------------------|
| 1       | 399                                    | 10.10                     | 5.65                  | 0.39                                                       |
| 2       | 295                                    | 9.88                      | 6.30                  | 0.40                                                       |
| 3       | 256                                    | 13.20                     | 3.68                  | 0.25                                                       |
| 4       | 370                                    | 7.57                      | 1.70                  | 0.07                                                       |
| Average | 330                                    | 10.19                     | 4.33                  | 0.28                                                       |

<sup>a)</sup> The sample was prepared independently by photopolymerization of NIPAM/Men (3/2), which was prepared by mixing at 40 °C, with DMPA under LED-UV light (365 nm, 130 mW/cm<sup>2</sup>).  $[I]_0/[M]_0 = 1/100$ . <sup>b)</sup> Calculated from stress at small strain (0.05-0.25). <sup>c)</sup> Estimated by the area under the stress-strain curve until fracture point.

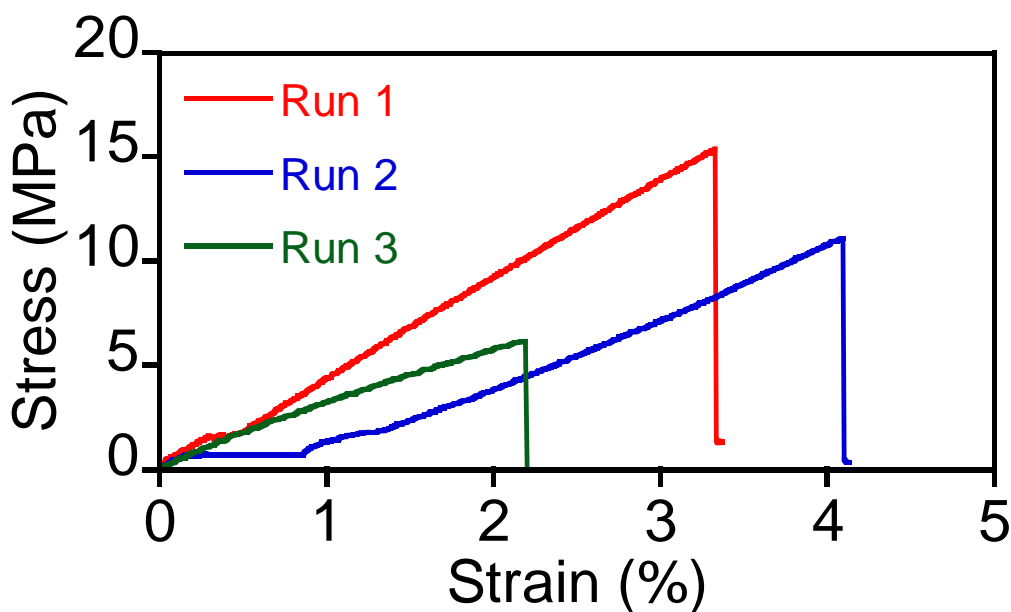

**Figure S25.** Stress–strain curves of polymerized products prepared from NIPAM/Men (2/1).

**Table S16.** Mechanical properties of the polymerized products prepared from NIPAM/Men (2/1) <sup>a)</sup>

| Run     | Young`s modulus <sup>b)</sup><br>(MPa) | Maximum<br>strength<br>(MPa) | Maximum strain<br>(%) | Modulus of<br>toughness <sup>c)</sup><br>(MJ/m <sup>3</sup> ) |
|---------|----------------------------------------|------------------------------|-----------------------|---------------------------------------------------------------|
| 1       | 457                                    | 15.36                        | 3.36                  | 0.25                                                          |
| 2       | 169                                    | 11.06                        | 4.09                  | 0.19                                                          |
| 3       | 366                                    | 6.17                         | 2.19                  | 0.07                                                          |
| Average | 331                                    | 10.86                        | 3.21                  | 0.17                                                          |

<sup>a)</sup> The sample was prepared independently by photopolymerization of NIPAM/Men (2/1), which was prepared by mixing at 50 °C, with DMPA under LED-UV light (365 nm, 130 mW/cm<sup>2</sup>).  $[I]_0/[M]_0 = 1/100$ . <sup>b)</sup> Calculated from stress at small strain (0.05-0.25). <sup>c)</sup> Estimated by the area under the stress-strain curve until fracture point.

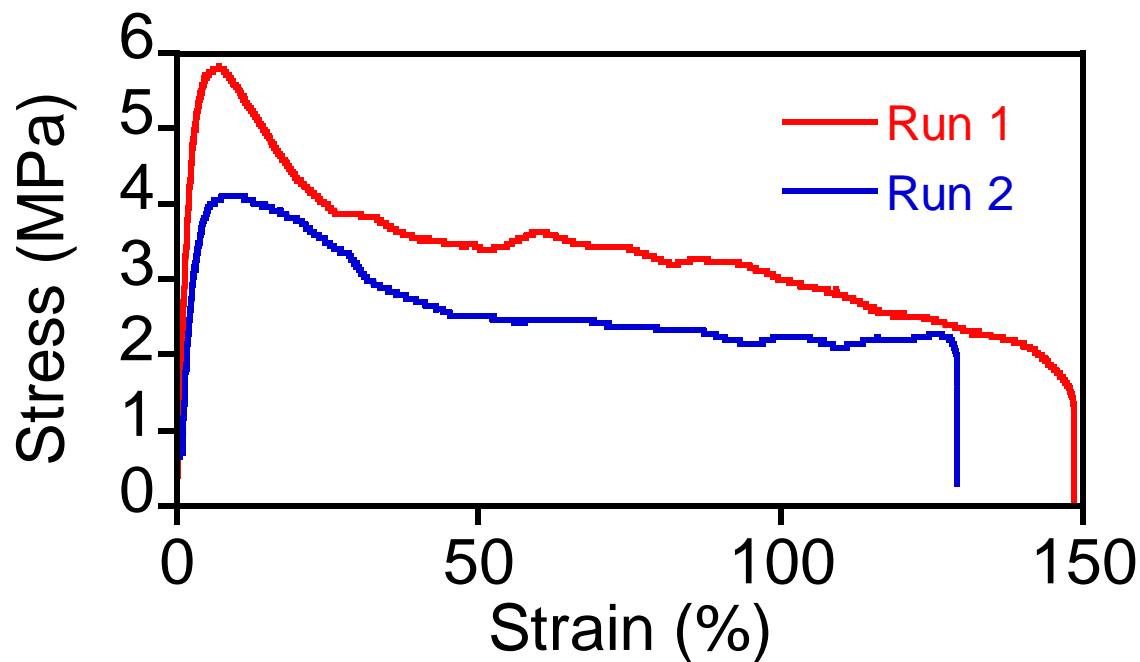

**Figure S26.** Stress–strain curves of polymerized products prepared from NIPAM/Thy (3/2).

**Table S17.** Mechanical properties of the polymerized products prepared from NIPAM/Thy (3/2) <sup>a)</sup>

| Run     | Young's modulus <sup>b)</sup><br>(MPa) | Maximum strength<br>(MPa) | Maximum strain<br>(%) | Modulus of toughness <sup>c)</sup><br>(MJ/m <sup>3</sup> ) |
|---------|----------------------------------------|---------------------------|-----------------------|------------------------------------------------------------|
| 1       | 20.0                                   | 5.82                      | 148.70                | 4.95                                                       |
| 2       | 212                                    | 4.05                      | 129.24                | 3.43                                                       |
| Average | 116                                    | 4.94                      | 138.97                | 4.19                                                       |

<sup>a)</sup> The sample was prepared independently by photopolymerization of NIPAM/Thy (3/2) with DMPA at room temperature under LED-UV light (365 nm, 130 mW/cm<sup>2</sup>).  $[I]_0/[M]_0 = 1/100$ . <sup>b)</sup> Calculated from stress at small strain (0.05-0.25). <sup>c)</sup> Estimated by the area under the stress-strain curve until fracture point.

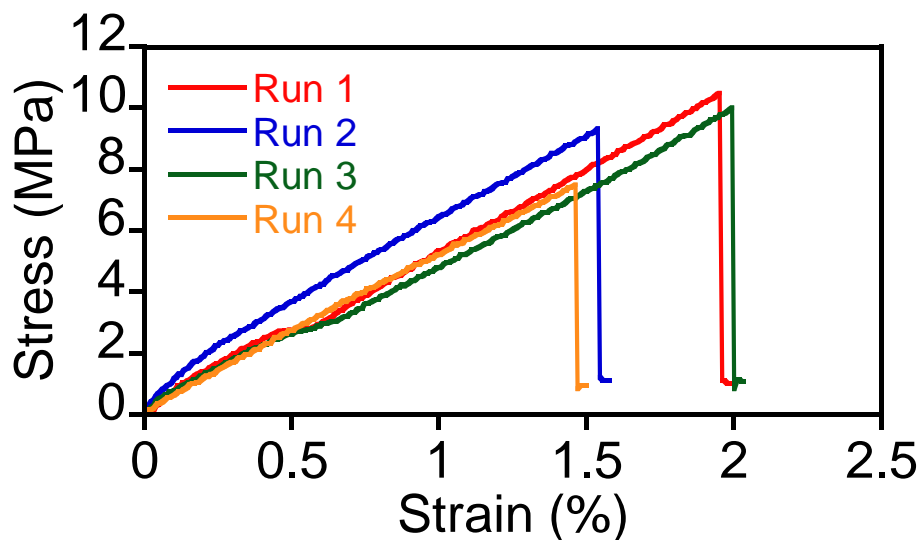

**Figure S27.** Stress–strain curves of polymerized products prepared from NIPAM/Thy (2/1).

**Table S18.** Mechanical properties of the polymerized products prepared from NIPAM/Thy (2/1) <sup>a)</sup>

| Run     | Young's modulus <sup>b)</sup><br>(MPa) | Maximum strength<br>(MPa) | Maximum strain<br>(%) | Modulus of toughness <sup>c)</sup><br>(MJ/m <sup>3</sup> ) |
|---------|----------------------------------------|---------------------------|-----------------------|------------------------------------------------------------|
| 1       | 627                                    | 10.47                     | 1.95                  | 0.10                                                       |
| 2       | 781                                    | 9.31                      | 1.54                  | 0.08                                                       |
| 3       | 501                                    | 9.98                      | 1.99                  | 0.10                                                       |
| 4       | 533                                    | 7.47                      | 1.46                  | 0.06                                                       |
| Average | 611                                    | 9.31                      | 1.74                  | 0.09                                                       |

<sup>a)</sup> The sample was prepared independently by photopolymerization of NIPAM/Thy (2/1) with DMPA at room temperature under LED-UV light (365 nm, 130 mW/cm<sup>2</sup>).  $[I]_0/[M]_0 = 1/100$ . <sup>b)</sup> Calculated from stress at small strain (0.05-0.25). <sup>c)</sup> Estimated by the area under the stress-strain curve until fracture point.

NIPAM/Men (1/1)

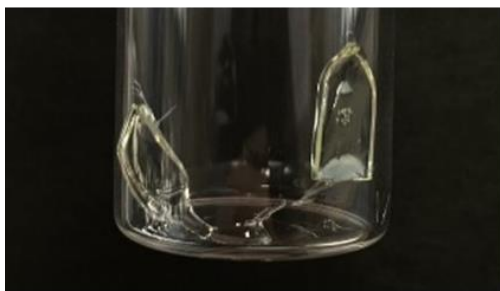

NIPAM/Thy (1/1)

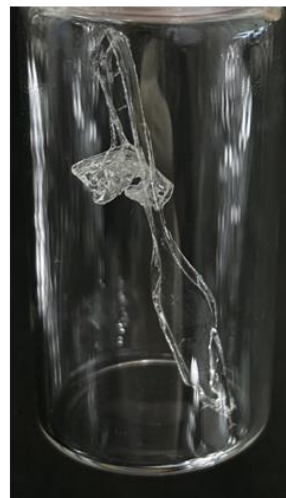

**Figure S28.** Photographs of the samples prepared by photo-induced free radical polymerization of NIPAM/Men (1/1) and NIPAM/Thy (1/1).

#### References

- (1) van Osch, D. J. G. P.; Dietz, C. H. J. T.; van Spronsen, J.; Kroon, M. C.; Gallucci, F.; Annaland, M. v. S.; Tuinier, R.: A Search for Natural Hydrophobic Deep Eutectic Solvents Based on Natural Components. *ACS Sustainable Chemistry & Engineering* **2019**, *7*, 2933-2942.
- (2) Kanto, R.; Qiao, Y.; Masuko, K.; Furusawa, H.; Yano, S.; Nakabayashi, K.; Mori, H.: Synthesis, Assembled Structures, and DNA Complexation of Thermoresponsive Lysine-Based Zwitterionic and Cationic Block Copolymers. *Langmuir* **2019**, *35*, 4646–4659.
